# Supplementary material for: Trinitromethyl-triazolone (TNMTO): a highly dense oxidizer
Source: Royal Society of Chemistry journal article supplement (doi:10.1039/d3dt02232c), 2023-01-01
Supplement: d3dt02232c1.pdf [file d3dt02232c1.pdf]

# Electronic Supporting Information For

## Trinitromethyl-Triazolone (TNMTO): A Highly Dense Oxidizer

Sohan Lal<sup>a</sup>, Richard J. Staples<sup>b</sup>, Jean'ne M. Shreeve<sup>a\*</sup>

<sup>a</sup>Department of Chemistry, University of Idaho, Moscow,  
Idaho 83844-2343

<sup>b</sup>Department of Chemistry, Michigan State University, East  
Lansing, Michigan 48824

To whom correspondence should be addressed. E-mail:

[jshreeve@uidaho.edu](mailto:jshreeve@uidaho.edu). Fax: +1-208-885-9146

| Entry | Table of Contents                                                                                                                                                            | Page    |
|-------|------------------------------------------------------------------------------------------------------------------------------------------------------------------------------|---------|
| 1     | Table S1. Calculated Total Energy ( $E_0$ ), Zero-point Energy (ZPE), values of Thermal Correction (HT) and Enthalpy of Formation ( $\Delta_f H^\circ$ (g)) of the compounds | S3      |
| 2     | Figure S1: Isodesmic reaction for TNMTO                                                                                                                                      | S3      |
| 3     | Table S2: The standard enthalpy of combustion $\Delta H_f^\circ$ (combust) for TNMTO                                                                                         | S4      |
| 4     | Figure S2. Computed electrostatic potential (ESP) maps of RDX, NTO, DNMTO                                                                                                    | S4      |
| 5     | Figure S3. Non-covalent interaction (NCI) plots for NTO and DNMTO                                                                                                            | S5      |
| 6     | Table S3. Comparison of the ratio of positive and negative ESPs                                                                                                              | S5      |
| 7     | Figure S4. Predicted UV-Visible spectrum of TNMTO                                                                                                                            | S6      |
| 8     | Experimental section                                                                                                                                                         | S6-S9   |
| 9     | Figure S5-S9. Single crystal X-ray structure of TNMTO                                                                                                                        | S10-S12 |
| 10    | Tables S4-S10. Single crystal X-ray data of TNMTO                                                                                                                            | S12-S15 |
| 11    | Table S11. Single crystal X-ray data of compound 9                                                                                                                           | S16     |
| 12    | Table S12. Single crystal X-ray data of compound 11.H <sub>2</sub> O                                                                                                         | S17     |
| 13    | Figures S10-S25. FTIR, <sup>1</sup> H, <sup>13</sup> C NMR plots                                                                                                             | S18-S25 |
| 14    | Figures S26-S35. DSC plots of title compounds                                                                                                                                | S26-S30 |
| 15    | Figures S36-S42. TGA plots of title compounds                                                                                                                                | S31-S34 |
| 16    | Tables S13-S16. Cartesian coordinates (in Å) for the optimized structures                                                                                                    | S34-S37 |
| 17    | Figure S43. Comparison of bond dissociation energies                                                                                                                         | S37     |
| 18    | Figure S44. Comparison of detonation velocity and detonation pressure                                                                                                        | S38     |
| 19    | Figure S45. Comparison of heat of detonation (Q).                                                                                                                            | S38     |
| 20    | Figure S46. Comparison of characteristic velocity (C*)                                                                                                                       | S39     |
| 21    | References                                                                                                                                                                   | S39-S40 |

Table S1. Calculated Total Energy ( $E_0$ ), Zero-point Energy (ZPE), values of Thermal Correction ( $H_T$ ) and Enthalpy of Formation ( $\Delta_f H^\circ$  (g)) of the title compounds using B3LYP/6-31+G\*\*//MP2/6-311++G\*\* level of theory (Isodesmic).

| Compounds                       | $E_0$              | ZPE                | $H_T$              | $\Delta_f H^\circ$ (g) kJ/mol             | $\Delta_f H_{\text{sub}}^\circ$ kJ/mol | $\Delta_f H^\circ$ (s) kJ/mol |
|---------------------------------|--------------------|--------------------|--------------------|-------------------------------------------|----------------------------------------|-------------------------------|
|                                 | [Hartree/Particle] | [Hartree/Particle] | [Hartree/Particle] |                                           |                                        |                               |
| CH <sub>4</sub>                 | -40.3796224        | 0.044793           | 0.003812           | -74.60 <sup>a</sup>                       | ----                                   | ----                          |
| CH <sub>3</sub> NO <sub>2</sub> | -244.4784821       | 0.049840           | 0.005298           | -74.30 <sup>a</sup>                       | ----                                   | ----                          |
| CH <sub>3</sub> CH <sub>3</sub> | -79.5716305        | 0.074610           | 0.004428           | -84.00 <sup>a</sup>                       | ----                                   | ----                          |
| TNE                             | -691.8636667       | 0.082007           | 0.011245           | -91.63 <sup>a</sup>                       | ----                                   | ----                          |
| TO                              | -316.7572189       | 0.064231           | 0.005616           | -25.87 <sup>a</sup>                       | ----                                   | ----                          |
| MTO                             | -355.9630511       | 0.091809           | 0.007306           | -41.80 <sup>a</sup>                       | ----                                   | ----                          |
| NTO, 5                          | -520.8511701       | 0.066465           | 0.007992           | -20.55 <sup>a</sup> (-25.57) <sup>b</sup> | 47.75 <sup>c</sup>                     | -68.30                        |
| TNMTO, 6                        | -968.2367424       | 0.097889           | 0.014696           | -49.43 <sup>b</sup>                       | 15.04 <sup>c</sup>                     | -64.47                        |

[a] Obtained at G2 level. <sup>b</sup>Calculated using isodesmic equation as shown in Fig. S1. <sup>c</sup>Calculated using  $\Delta H_{\text{sub}} = 0.188 \times T / \text{kJmol}^{-1} \text{K}^{-1}$

The gas-phase enthalpy of formation  $\Delta_f H^\circ$ (g) was predicted using Gaussian 03 program<sup>1</sup> according to isodesmic equation as shown in Figure S1.

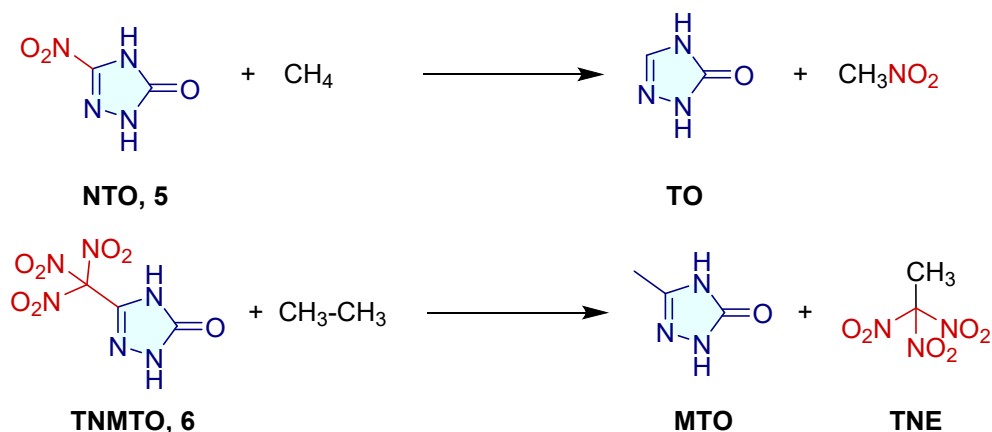

Fig. S1 Isodesmic reaction for TNMTO

Subsequently, for TNMTO, solid-phase enthalpy of formation  $\Delta_f H^\circ$  (s) were calculated by using equation 1.<sup>2-4</sup>

$$\Delta_f H^\circ(\text{s}) = \Delta_f H^\circ(\text{g}) - \Delta H_{\text{sub}} \quad (1)$$

Where,  $\Delta_f H^\circ$ (s) is solid phase enthalpy of formation,  $\Delta_f H^\circ$ (g) is gas phase enthalpy of formation and  $\Delta H_{\text{sub}}$  is the enthalpy of sublimation.

The enthalpy of sublimation was estimated using equation 2 as per Trouton's rule.<sup>5</sup>

$$\Delta H_{\text{sub}} = 0.188 \times T / \text{kJmol}^{-1} \text{K}^{-1} \quad (2)$$

where,  $T$ , is either the melting point (mp) or the decomposition temperature ( $T_d$ ), when no melting happens before decomposition.

The bond dissociation energies (BDEs) of compounds TNMTO and TNAА were estimated according to following equation 3.

$$\text{BDE [AB]} = E_0 [\text{A.}] + E_0 [\text{B.}] - E_0 [\text{AB}] \quad (3)$$

where, BDE [AB] is bond dissociation energy and  $E_0$  [A.] and  $E_0$  [B.] are the energies of individual homolytic part and  $E_0$  [AB] is the total energy of the individual molecule.

Table S2. The standard enthalpy of combustion  $\Delta H_f^\circ$  (combust) for the title compounds was calculated by following equation 8.

$$\Delta_f H^\circ_{(\text{combust})} = \sum \Delta_f H^\circ_{(\text{products})} - \sum \Delta_f H^\circ_{(\text{reactants})} \quad (4)$$

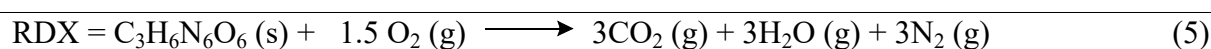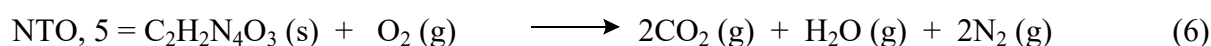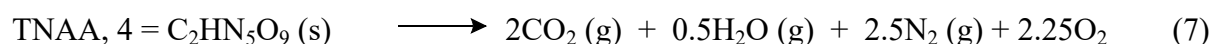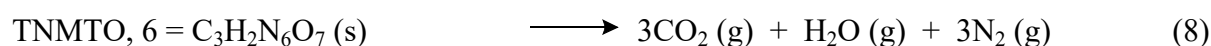

The standard enthalpy of formation for  $\text{CO}_2$  ( $\Delta H_f(\text{CO}_2) = -393.51 \text{ kJmol}^{-1}$ );  $\text{H}_2\text{O}$  ( $\Delta H_f(\text{H}_2\text{O}) = -243.015 \text{ kJmol}^{-1}$ ).

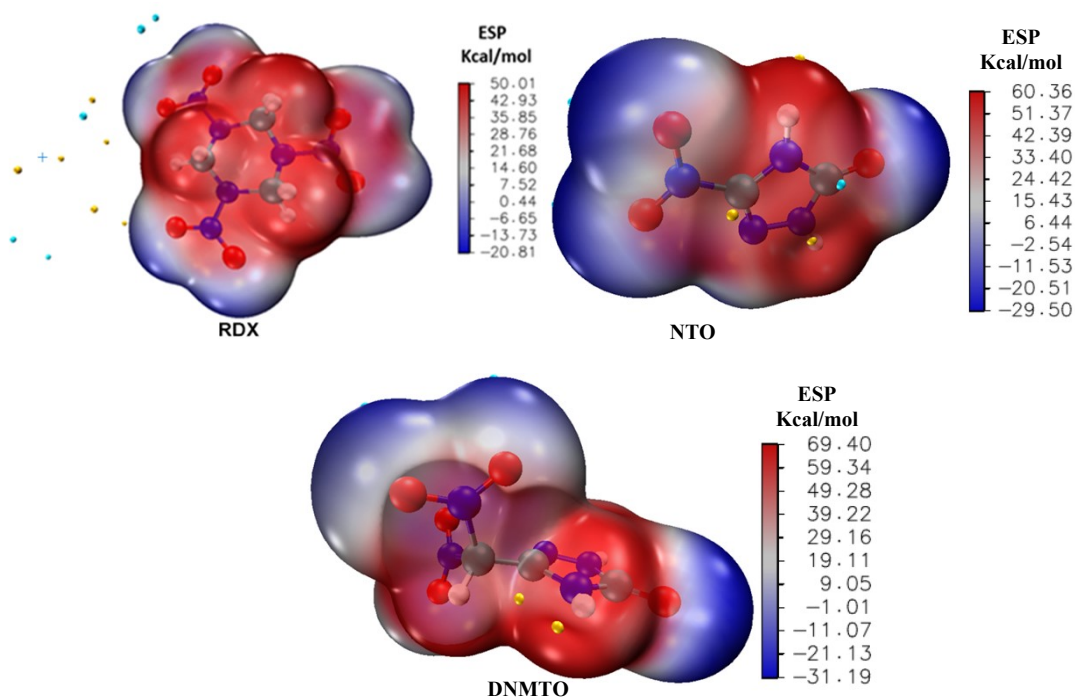

Fig. S2 Computed electrostatic potential (ESP) maps of RDX, NTO and DNMT0.

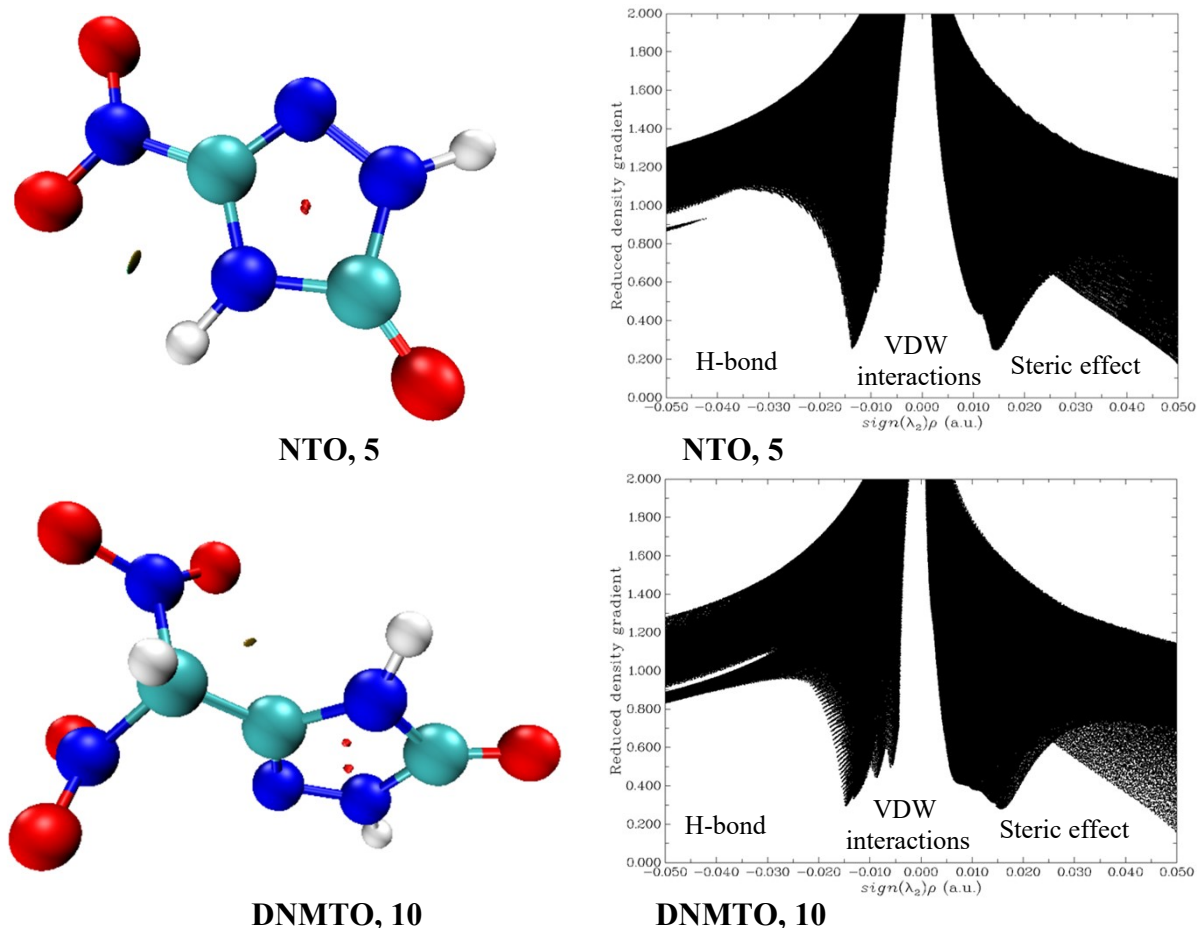

Fig. S3 Non-covalent interaction (NCI): Reduced density gradient (RDG) and scatter diagram of NTO and DNMT0.

Table S3. Comparison of the ratio of positive and negative ESPs and the surface area of ESPs of compounds and positive variance, total variance, balance of charges and product of total variance and balance of charges.

| Compounds | $A_{tot}^a$<br>$\text{\AA}^2$ | $A_{pos}^b$<br>$\text{\AA}^2$ | $A_{neg}^c$<br>$\text{\AA}^2$ | ratio <sub>pos</sub><br>(%) | ratio <sub>neg</sub><br>(%) | $\sigma_{tot}^2 v^d$<br>(kcal/mol) |
|-----------|-------------------------------|-------------------------------|-------------------------------|-----------------------------|-----------------------------|------------------------------------|
| TNMTO, 6  | 205.40                        | 102.51                        | 102.89                        | 49.90                       | 50.10                       | 38.80                              |
| DNMT0, 10 | 187.12                        | 87.93                         | 99.19                         | 46.99                       | 53.01                       | 45.12                              |
| TNT       | 221.89                        | 128.42                        | 93.47                         | 57.88                       | 42.12                       | 22.48                              |
| NTO, 5    | 139.77                        | 73.55                         | 66.22                         | 52.62                       | 47.38                       | 43.76                              |
| RDX       | 209.49                        | 116.77                        | 92.72                         | 55.74                       | 44.26                       | 27.29                              |

<sup>a</sup> $SA_{tot}$  = Total surface area. <sup>b</sup> $SA_{pos}$  = positive surface area. <sup>c</sup> $SA_{neg}$  = Negative surface area. <sup>d</sup>Ratio of positive surface area <sup>e</sup>Ratio of negative surface area. <sup>g</sup>Product of total variance and balance of charges.

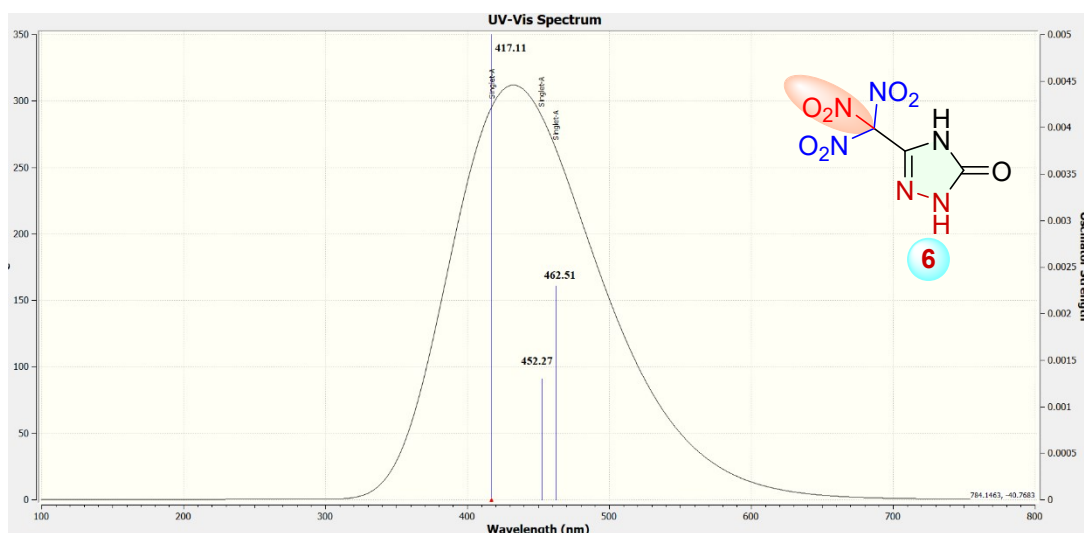

Fig. S4 Predicted UV-Visible spectrum of TNMTO at B3LYP/6-311++G(d,p) level.

## EXPERIMENTAL SECTION

### General Methods

All reagents and solvents were used as received unless otherwise specified (AKSci, Sigma-Aldrich, Acros Organics, VWR). The densities of the new compounds were measured at 25 °C with a Micromeritics Accupyc II 1340 gas pycnometer. Thermal stabilities (melting and decomposition points) were measured by heating individual samples from 35 to 400 °C at a heating rate of 5 °C min<sup>-1</sup> and 10 °C min<sup>-1</sup> on a Differential Scanning Calorimeter (DSC, TA Instruments Company, Model: Q2000) and thermogravimetric analysis (TGA, TA Instruments Company, Model: Q50). The FTIR spectra were recorded using KBr plates on a Thermo Nicolet AVATAR 370 spectrometer. <sup>1</sup>H and <sup>13</sup>C NMR spectra were obtained on a 500 MHz (Bruker) nuclear magnetic resonance spectrometer operating at 500.19 and 125.77 MHz, respectively, using DMSO-d<sub>6</sub> as the solvent and locking solvent. The <sup>15</sup>N NMR spectra were recorded on a 500.19 MHz (Bruker 500) nuclear magnetic resonance operating at 50.70 MHz. As external standards, the chemical shifts are given relative to tetramethylsilane (<sup>1</sup>H, <sup>13</sup>C) and nitromethane (<sup>15</sup>N). Elemental analyses (C, H, N) were performed on a Vario Micro cube Elemental Analyser.

The crystals of compounds 6, 9 and 11.H<sub>2</sub>O were mounted on a nylon loop with Paratone oil on an XtaLAB Synergy, Dualflex, HyPix diffractometer at 100 K. The structures were solved with the ShelXT<sup>6-9</sup> solution program using dual methods and Olex2.<sup>10</sup> The model was refined with ShelXL<sup>6-9</sup> using full matrix least squares minimization on F<sup>2</sup>.

### Caution!

The compounds studied are potentially high-energy materials. Therefore, it is strongly recommended that they should be synthesized in only small amounts and handled with extreme care.

*5-(Trinitromethyl)-2,4-dihydro-3H-1,2,4-triazol-3-one* (6). Compound 10 (1.89 g, 10.0 mmol, 1.0 equiv.) was added in portions to pre-cooled 100% HNO<sub>3</sub> (18.9 g, 12.6 mL, 300.0 mmol, 30.0 equiv.), at -10 °C. The reaction mixture was maintained at that temperature for another 5 h. The HNO<sub>3</sub> was evaporated to leave a slightly yellow solid which was triturated with DCM to give pure 6 in excellent yield. White solid, 2.15 g, 90% yield, DSC (5 °C min<sup>-1</sup>): T<sub>d (onset)</sub> = 80 °C. IR (KBr, ν, cm<sup>-1</sup>) 3178 (s), 3053 (s), 2920 (s), 1715 (s), 1594 (s), 1476 (s), 1381 (s), 1278 (s), 1066 (s), 1031 (s), 944 (m), 803 (s), 777 (m), 735 (m); <sup>1</sup>H NMR (500.19 MHz, Acetone-d<sub>6</sub>): δ 9.13 (br s, 1H), 12.35 (br s, 1H); <sup>13</sup>C NMR (125.77 MHz, CD<sub>3</sub>CN): δ 125.8, 132.8, 155.1; Elemental analysis: calcd (%) for C<sub>3</sub>H<sub>2</sub>N<sub>6</sub>O<sub>7</sub> (234.08): C 15.39, H 0.86, 35.90; found: C 15.30, H 1.46, N 34.77. The compound reacted slowly with CD<sub>3</sub>CN, and acetone-d<sub>6</sub>, reacted vigorously with D<sub>2</sub>O, and DMSO-d<sub>6</sub> and subsequently decomposed with an exothermic reaction. It is stable in anhydrous DCM and CHCl<sub>3</sub> at room temperature however, TNMTO is partially soluble in DCM and CHCl<sub>3</sub>.

*2-(Dinitromethylene)-5,5-dinitro-2,5-dihydropyrimidine-4,6-diol* (8). 4,6-Dihydroxy-2-methylpyrimidine 7 (8.0 g, 63.49 mmol, 1.0 equiv.) was added in portions to conc. H<sub>2</sub>SO<sub>4</sub> (64.0

g, 24.0 mL, 65.30 mmol, 1.03 equiv.) at 0 °C. The mixture was cooled to -10 °C, and 100% HNO<sub>3</sub> (54.0 g, 36.0 mL, 85.71 mmol, 1.58 equiv.) was added. After 1.5 h, the white precipitate was filtered off, immediately washed with TFA (20 mL) and trifluoroacetic anhydride (20 mL), and dried to give a white solid 8, Yield: 17.48 g, 90%, DSC (5 °C min<sup>-1</sup>): T<sub>d (onset)</sub> = 86 °C. IR (KBr, ν, cm<sup>-1</sup>) 3600 (s), 3518 (s), 3326 (s), 3197 (s), 3061 (s), 1628 (s), 1528 (s), 1401 (s), 1343 (s), 1290 (s), 1207 (s), 1154 (s), 1132 (s), 1037 (s), 895 (m), 812 (m), 794 (m), 747 (s), 724 (s); <sup>1</sup>H NMR (500.19 MHz, CDCl<sub>3</sub>): δ 7.66 (br s, 2H); <sup>13</sup>C NMR (125.77 MHz, DMSO-d<sub>6</sub>): δ 98.8, 107.1, 125.0, 158.2. Elemental analysis: calcd (%) for C<sub>5</sub>H<sub>2</sub>N<sub>6</sub>O<sub>10</sub> (306.10): C 19.62, H 0.66, 27.46; found: C 19.70, H 1.09, N 27.64.

*Hydrazinium 3-dinitromethanide-1,2,4-triazolone* (9). Compound 8 (4.590 g, 15.0 mmol, 1.0 equiv.) was added portion-wise to hydrazine hydrate (20 mL, 40% solution in water) at 0 °C. The resulting yellow mixture was stirred for another 5 h. The excess hydrazine was quenched with conc. HCl at 0 °C, and the yellow precipitate was filtered off, washed with cold water, and dried to give pure 9 as a light-yellow solid. 2.85 g, 86%, DSC (5 °C min<sup>-1</sup>): T<sub>d (onset)</sub> = 178 °C. IR (KBr, ν, cm<sup>-1</sup>) 3342 (s), 3289 (s), 3068 (m), 2988 (m), 2882 (m), 2635 (m), 1721 (s), 1629 (m), 1575 (m), 1545 (m), 1509 (s), 1454 (m), 1419 (w), 1341 (m), 1247 (s), 1141 (s), 1102 (s), 1080 (m), 1041 (m), 965 (m), 746 (m), 680 (m); <sup>1</sup>H NMR (500.19 MHz, DMSO-d<sub>6</sub>): δ 7.1 (br s, 5H), 11.21 (br s, 1H), 11.48 s, 1H); <sup>13</sup>C NMR (125.77 MHz, DMSO-d<sub>6</sub>): δ 124.6, 139.6, 156.3; Elemental analysis: calcd (%) for C<sub>3</sub>H<sub>7</sub>N<sub>7</sub>O<sub>5</sub> (221.13): C 16.29, H 3.19, 44.34; found: C 16.22, H 3.14, N 44.34.

*5-(Dinitromethyl)-2,4-dihydro-3H-1,2,4-triazol-3-one* (10). Compound 9 (4.42 g, 20.0 mmol, 1.0 equiv.) was dissolved in acetonitrile (100 mL), and HCl (12M, 3.0 mL) was added at 0 °C. The resulting mixture was then heated at 60 °C for 1 h. The white precipitate was removed by filtration, washed with acetonitrile and the filtrate was dried under air to give compound 10 in



pure form as a white solid, 3.0 g, 80%, DSC ( $5\text{ }^{\circ}\text{C min}^{-1}$ ):  $T_{d(\text{onset})} = 88\text{ }^{\circ}\text{C}$ . IR (KBr,  $\nu$ ,  $\text{cm}^{-1}$ ) 3175 (s), 3034 (s), 2954 (s), 1744 (s), 1697 (s), 1596 (s), 1515 (m), 1487 (m), 1383 (m), 1366 (m), 1325 (s), 1292 (m), 1235 (s), 1201 (s), 1127 (s), 1093 (s), 1039 (m), 1011 (m), 821 (m), 778 (m), 744 (m);  $^1\text{H NMR}$  (500.19 MHz, acetone- $d_6$ ):  $\delta$  8.06 (s, 1H), 11.75 (s, 1H);  $^{13}\text{C NMR}$  (125.77 MHz, acetone- $d_6$ ):  $\delta$  105.1, 134.9, 155.9; Elemental analysis: calcd (%) for  $\text{C}_3\text{H}_3\text{N}_5\text{O}_5$  (189.09): C 19.06, H 1.60, 37.04; found: C 19.98, H 2.09, N 37.74.

*Ammonium-6-(dinitromethylene)-11<sup>2</sup>,3,5-triazinane-2,4-dione* ( $11\cdot\text{H}_2\text{O}$ ). Compound 8 (4.590 g, 15.0 mmol, 1.0 equiv.) was added portion-wise to aqueous  $\text{NH}_3$  (25 mL, 30% solution in water) at  $0\text{ }^{\circ}\text{C}$ . The resulting yellow mixture was stirred for 6 h. The yellow precipitate was filtered, washed with  $\text{CH}_3\text{CN}$ , and dried to give pure  $11\cdot\text{H}_2\text{O}$  as a light-yellow solid (3.48 g, 92%), DSC ( $5\text{ }^{\circ}\text{C min}^{-1}$ ):  $T_{d(\text{onset})} = 200\text{ }^{\circ}\text{C}$ . IR (KBr,  $\nu$ ,  $\text{cm}^{-1}$ );  $^1\text{H NMR}$  (500.19 MHz, DMSO- $d_6$ ):  $\delta$  6.64 (br s, 4H);  $^{13}\text{C NMR}$  (125.77 MHz, DMSO- $d_6$ ):  $\delta$  133.0, 157.5, 161.6; Elemental analysis: calcd (%) for  $\text{C}_4\text{H}_8\text{N}_6\text{O}_7$  (252.14): C 19.05, H 3.20, 33.30; found: C 19.76, H 3.30, N 33.28.

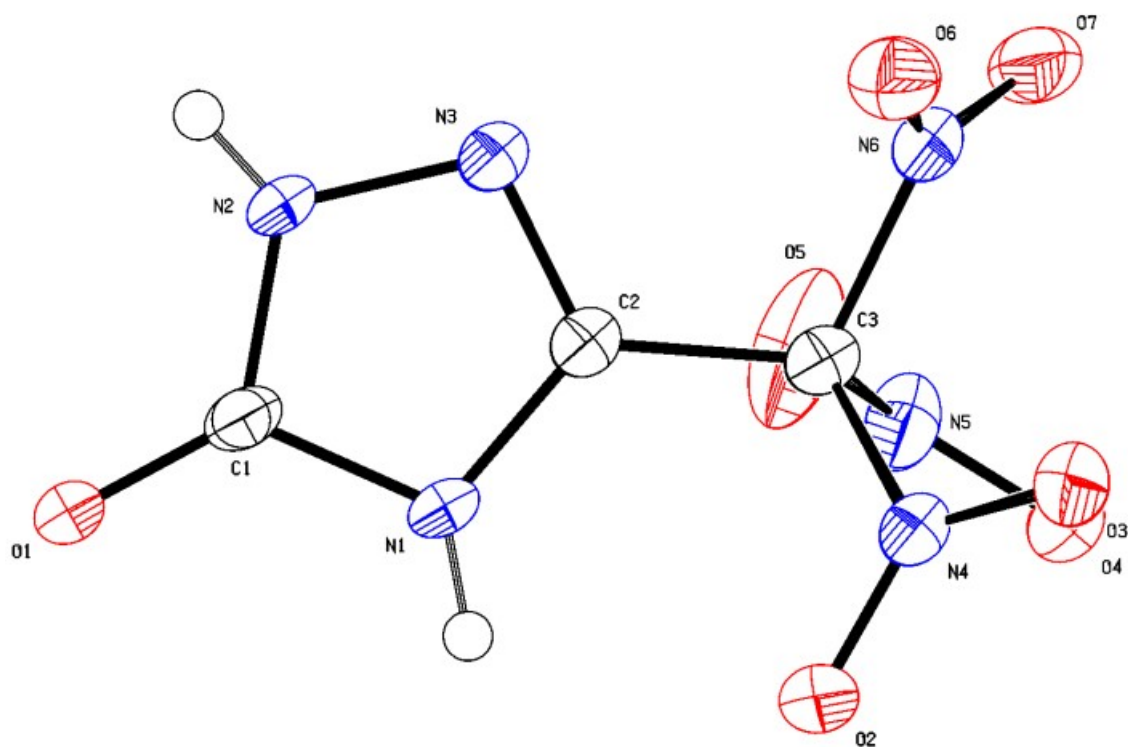

Fig. S5 Single crystal X-ray structure of TNMTO. Drawing at 50% ellipsoids with heteroatoms labelled and the hydrogen atoms found and refined isotropically.

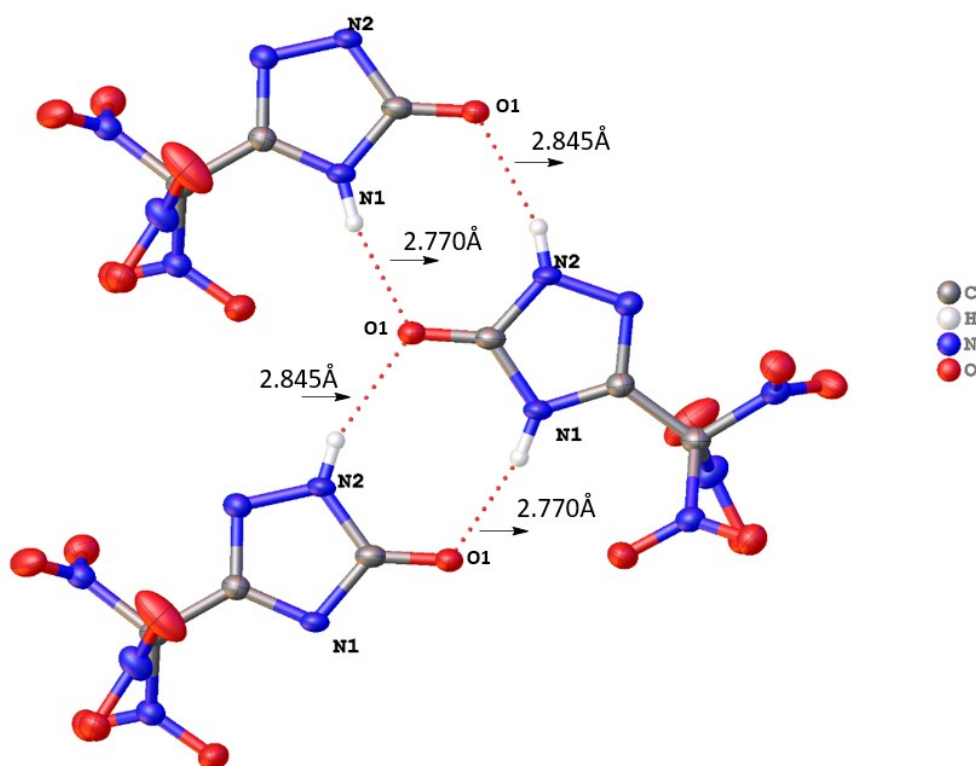

Fig. S6 The following hydrogen bonding interactions with a maximum D-D distance of 3.1 Å and a minimum angle of 110° are present in TNMTO: N1–O1<sub>1</sub>: 2.77 Å, N2–O1<sub>2</sub>: 2.845 Å.

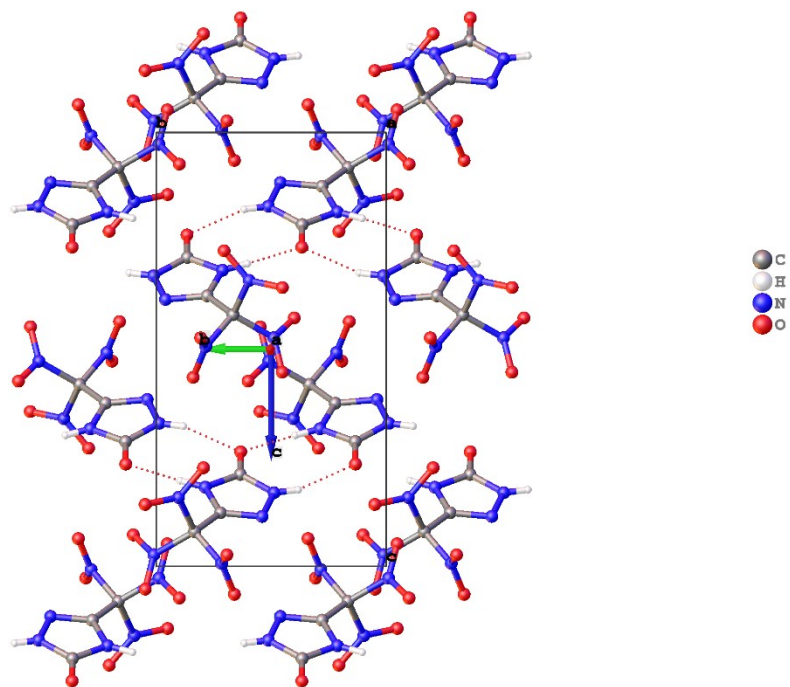

Fig. S7 Packing diagram of TNMTO viewed along a axis

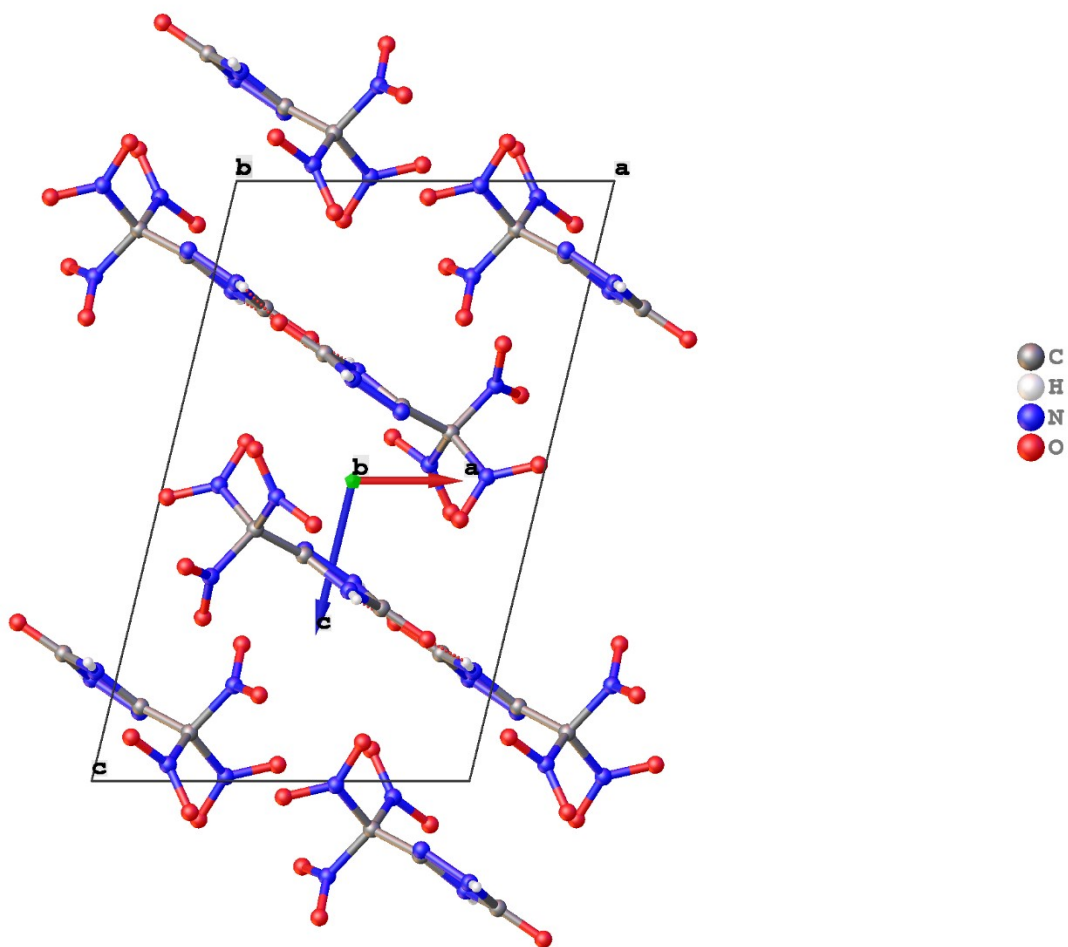

Fig. S8 Packing diagram of TNMTO viewed along the b axis

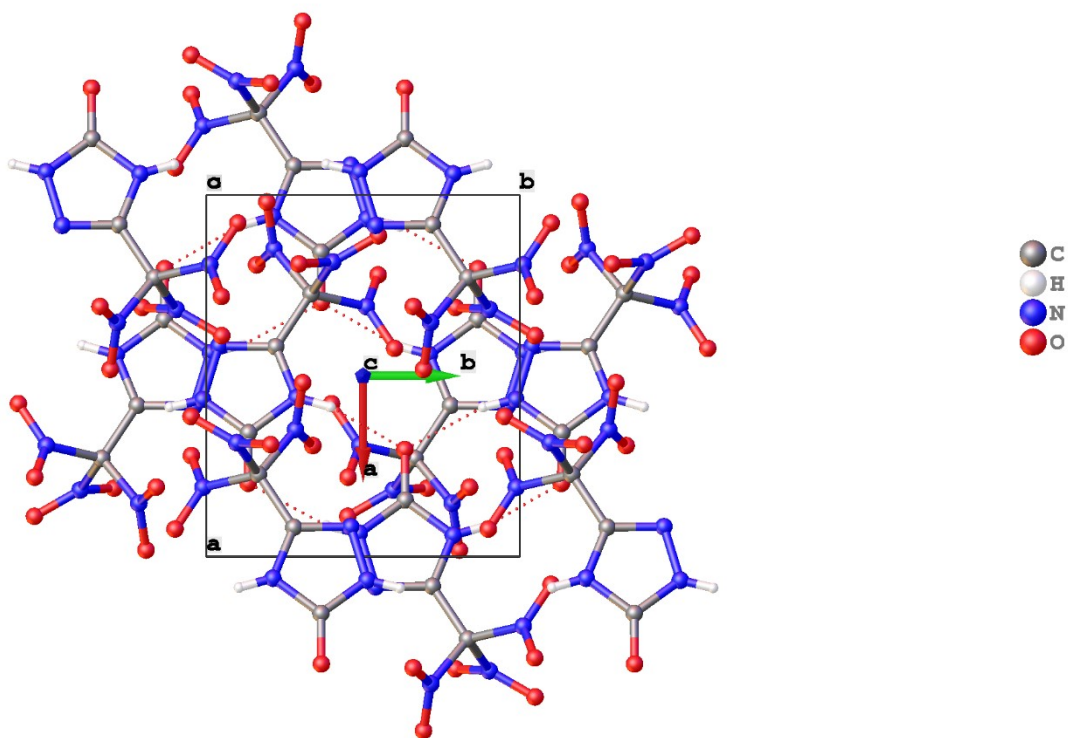

Fig. S9 Packing diagram of TNMTO viewed along the c axis

Table S4: Fractional Atomic Coordinates ( $\times 10^4$ ) and Equivalent Isotropic Displacement Parameters ( $\text{\AA}^2 \times 10^3$ ) for TNMTO.  $U_{eq}$  is defined as 1/3 of the trace of the orthogonalised  $U_{ij}$ .

| Atom | x          | y          | z          | $U_{eq}$ |
|------|------------|------------|------------|----------|
| O1   | 2032.7(17) | 8668.2(19) | 2359.4(11) | 25.5(4)  |
| O2   | 5765.4(18) | 3997(2)    | 4271.4(13) | 34.2(4)  |
| O3   | 7798.8(17) | 4521(2)    | 5522.7(12) | 30.0(4)  |
| O4   | 8881.4(18) | 4511(2)    | 3571.0(13) | 31.8(4)  |
| O5   | 8103(3)    | 7051(3)    | 2724.6(16) | 59.3(7)  |
| O6   | 8074.7(19) | 8398(2)    | 5643.1(12) | 34.2(4)  |
| O7   | 9816.7(19) | 8072(2)    | 4732.0(15) | 38.4(4)  |
| N1   | 4405(2)    | 7122(2)    | 3172.0(13) | 23.1(4)  |
| N2   | 4351(2)    | 10124(3)   | 3300.4(14) | 24.1(4)  |
| N3   | 5833(2)    | 9602(2)    | 3847.3(14) | 25.5(4)  |
| N4   | 6920(2)    | 4891(2)    | 4729.3(14) | 26.5(4)  |
| N5   | 8157(2)    | 5966(3)    | 3407.7(15) | 32.7(4)  |
| N6   | 8519(2)    | 7842(3)    | 4929.8(15) | 28.0(4)  |
| C1   | 3433(2)    | 8655(3)    | 2877.9(16) | 23.4(4)  |
| C2   | 5814(2)    | 7789(3)    | 3762.2(16) | 23.3(4)  |
| C3   | 7277(2)    | 6660(3)    | 4196.4(16) | 25.3(4)  |

Table S5: Bond Lengths in Å for TNMTO.

| Atom | Atom | Length/Å |
|------|------|----------|
| O1   | C1   | 1.238(3) |
| O2   | N4   | 1.216(2) |
| O3   | N4   | 1.206(2) |
| O4   | N5   | 1.200(2) |
| O5   | N5   | 1.216(3) |
| O6   | N6   | 1.207(3) |
| O7   | N6   | 1.208(2) |
| N1   | C1   | 1.373(3) |
| N1   | C2   | 1.368(3) |
| N2   | N3   | 1.361(2) |
| N2   | C1   | 1.355(3) |
| N3   | C2   | 1.297(3) |
| N4   | C3   | 1.528(3) |
| N5   | C3   | 1.545(3) |
| N6   | C3   | 1.535(3) |
| C2   | C3   | 1.484(3) |

Table S6: Bond Angles in ° for TNMTO.

| Atom | Atom | Atom | Angle/°    |
|------|------|------|------------|
| C2   | N1   | C1   | 106.41(17) |
| C1   | N2   | N3   | 113.16(17) |
| C2   | N3   | N2   | 103.42(16) |
| O2   | N4   | C3   | 113.98(17) |
| O3   | N4   | O2   | 127.85(19) |
| O3   | N4   | C3   | 118.16(17) |
| O4   | N5   | O5   | 128.3(2)   |
| O4   | N5   | C3   | 117.07(18) |
| O5   | N5   | C3   | 114.42(18) |
| O6   | N6   | O7   | 128.3(2)   |
| O6   | N6   | C3   | 115.19(17) |
| O7   | N6   | C3   | 116.49(19) |
| O1   | C1   | N1   | 127.48(19) |
| O1   | C1   | N2   | 128.54(19) |
| N2   | C1   | N1   | 103.97(17) |
| N1   | C2   | C3   | 125.92(18) |
| N3   | C2   | N1   | 113.01(17) |
| N3   | C2   | C3   | 120.78(18) |
| N4   | C3   | N5   | 105.24(16) |
| N4   | C3   | N6   | 108.38(16) |
| N6   | C3   | N5   | 105.88(16) |
| C2   | C3   | N4   | 113.67(17) |
| C2   | C3   | N5   | 112.59(18) |
| C2   | C3   | N6   | 110.62(17) |

Table S7: Torsion Angles in ° for TNMTO.

| Atom | Atom | Atom | Atom | Angle/°     |
|------|------|------|------|-------------|
| O2   | N4   | C3   | N5   | -78.3(2)    |
| O2   | N4   | C3   | N6   | 168.83(17)  |
| O2   | N4   | C3   | C2   | 45.4(2)     |
| O3   | N4   | C3   | N5   | 100.4(2)    |
| O3   | N4   | C3   | N6   | -12.5(2)    |
| O3   | N4   | C3   | C2   | -135.9(2)   |
| O4   | N5   | C3   | N4   | -25.9(2)    |
| O4   | N5   | C3   | N6   | 88.8(2)     |
| O4   | N5   | C3   | C2   | -150.24(19) |
| O5   | N5   | C3   | N4   | 158.6(2)    |
| O5   | N5   | C3   | N6   | -86.7(2)    |
| O5   | N5   | C3   | C2   | 34.3(3)     |
| O6   | N6   | C3   | N4   | -62.5(2)    |
| O6   | N6   | C3   | N5   | -175.03(17) |
| O6   | N6   | C3   | C2   | 62.7(2)     |
| O7   | N6   | C3   | N4   | 116.32(19)  |
| O7   | N6   | C3   | N5   | 3.8(2)      |
| O7   | N6   | C3   | C2   | -118.4(2)   |
| N1   | C2   | C3   | N4   | -49.9(3)    |
| N1   | C2   | C3   | N5   | 69.7(3)     |
| N1   | C2   | C3   | N6   | -172.09(19) |
| N2   | N3   | C2   | N1   | 1.2(2)      |
| N2   | N3   | C2   | C3   | 175.43(19)  |
| N3   | N2   | C1   | O1   | 178.4(2)    |
| N3   | N2   | C1   | N1   | -0.5(2)     |
| N3   | C2   | C3   | N4   | 136.6(2)    |
| N3   | C2   | C3   | N5   | -103.8(2)   |
| N3   | C2   | C3   | N6   | 14.4(3)     |
| C1   | N1   | C2   | N3   | -1.5(2)     |
| C1   | N1   | C2   | C3   | -175.4(2)   |
| C1   | N2   | N3   | C2   | -0.4(2)     |
| C2   | N1   | C1   | O1   | -177.8(2)   |
| C2   | N1   | C1   | N2   | 1.2(2)      |

Table S8: Hydrogen Fractional Atomic Coordinates ( $\times 10^4$ ) and Equivalent Isotropic Displacement Parameters ( $\text{\AA}^2 \times 10^3$ ) for TNMTO.  $U_{eq}$  is defined as 1/3 of the trace of the orthogonalised  $U_{ij}$ .

| Atom | x        | y         | z        | $U_{eq}$ |
|------|----------|-----------|----------|----------|
| H1   | 4150(30) | 6040(50)  | 3020(20) | 36(8)    |
| H2   | 4140(30) | 11170(50) | 3230(20) | 33(8)    |

Table S9: Hydrogen Bond information for TNMTO.

| D  | H  | A               | d(D-H)/\AA | d(H-A)/\AA | d(D-A)/\AA | D-H-A/deg |
|----|----|-----------------|------------|------------|------------|-----------|
| N1 | H1 | O1 <sup>1</sup> | 0.81(3)    | 1.97(3)    | 2.770(2)   | 166(3)    |
| N2 | H2 | O1 <sup>2</sup> | 0.77(3)    | 2.11(3)    | 2.845(2)   | 161(3)    |

<sup>1</sup>1/2-x,-1/2+y,1/2-z; <sup>2</sup>1/2-x,1/2+y,1/2-z

Table S10. Single crystal X-ray data and structure refinement for TNMTO.<sup>6-10</sup>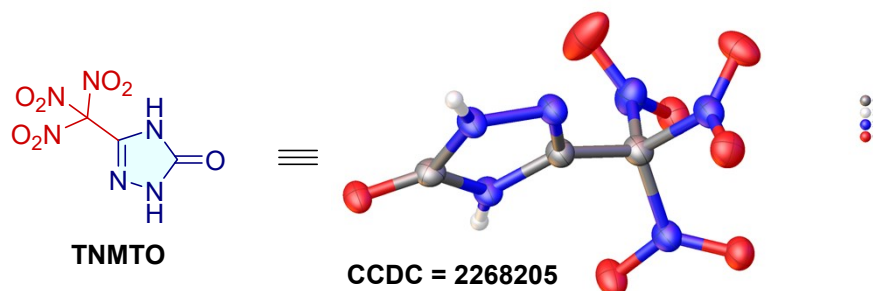

|                              |                                                                              |
|------------------------------|------------------------------------------------------------------------------|
| Formula                      | C <sub>3</sub> H <sub>2</sub> N <sub>6</sub> O <sub>7</sub> (CCDC = 2268205) |
| $D_{calc.}/g\ cm^{-3}$       | 1.902                                                                        |
| $m/mm^{-1}$                  | 1.682                                                                        |
| Formula Weight               | 234.11                                                                       |
| Colour                       | yellow                                                                       |
| Shape                        | needle-shaped                                                                |
| Size/mm <sup>3</sup>         | 0.11×0.04×0.02                                                               |
| $T/K$                        | 100.00(10)                                                                   |
| Crystal System               | monoclinic                                                                   |
| Space Group                  | $P2_1/n$                                                                     |
| $a/\text{Å}$                 | 8.4982(2)                                                                    |
| $b/\text{Å}$                 | 7.1276(2)                                                                    |
| $c/\text{Å}$                 | 13.8819(4)                                                                   |
| $a^\circ$                    | 90                                                                           |
| $b^\circ$                    | 103.573(3)                                                                   |
| $g^\circ$                    | 90                                                                           |
| $V/\text{Å}^3$               | 817.37(4)                                                                    |
| $Z$                          | 4                                                                            |
| $Z'$                         | 1                                                                            |
| Wavelength/Å                 | 1.54184                                                                      |
| Radiation type               | Cu $K_\alpha$                                                                |
| $Q_{min}^\circ$              | 5.585                                                                        |
| $Q_{max}^\circ$              | 80.393                                                                       |
| Measured Refl's.             | 8681                                                                         |
| Indep't Refl's               | 1751                                                                         |
| Refl's $I \geq 2\ \sigma(I)$ | 1461                                                                         |
| $R_{int}$                    | 0.0436                                                                       |
| Parameters                   | 153                                                                          |
| Restraints                   | 0                                                                            |
| Largest Peak                 | 0.488                                                                        |
| Deepest Hole                 | -0.402                                                                       |
| GooF                         | 1.055                                                                        |
| $wR_2$ (all data)            | 0.1356                                                                       |
| $wR_2$                       | 0.1274                                                                       |
| $R_1$ (all data)             | 0.0551                                                                       |
| $R_1$                        | 0.0459                                                                       |

Table S11. Single crystal X-ray data and structure refinement for compound 9.<sup>6-10</sup>

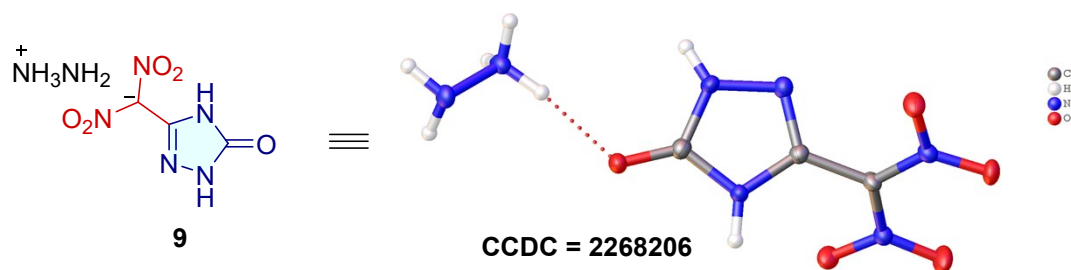

|                              |                                                                              |
|------------------------------|------------------------------------------------------------------------------|
| Formula                      | C <sub>3</sub> H <sub>7</sub> N <sub>7</sub> O <sub>5</sub> (CCDC = 2268206) |
| $D_{calc.}/g\text{ cm}^{-3}$ | 1.899                                                                        |
| $\mu/\text{mm}^{-1}$         | 1.554                                                                        |
| Formula Weight               | 221.16                                                                       |
| Colour                       | yellow                                                                       |
| Shape                        | needle-shaped                                                                |
| Size/ $\text{mm}^3$          | 0.17×0.02×0.01                                                               |
| $T/\text{K}$                 | 100.15                                                                       |
| Crystal System               | monoclinic                                                                   |
| Space Group                  | $P2_1/n$                                                                     |
| $a/\text{Å}$                 | 3.63691(18)                                                                  |
| $b/\text{Å}$                 | 17.1203(9)                                                                   |
| $c/\text{Å}$                 | 12.4539(6)                                                                   |
| $\alpha/^\circ$              | 90                                                                           |
| $\beta/^\circ$               | 94.177(4)                                                                    |
| $\gamma/^\circ$              | 90                                                                           |
| $V/\text{Å}^3$               | 773.38(7)                                                                    |
| $Z$                          | 4                                                                            |
| $Z'$                         | 1                                                                            |
| Wavelength/ $\text{Å}$       | 1.54184                                                                      |
| Radiation type               | Cu $K_\alpha$                                                                |
| $\theta_{min}/^\circ$        | 4.398                                                                        |
| $\theta_{max}/^\circ$        | 81.103                                                                       |
| Measured Refl's.             | 8241                                                                         |
| Indep't Refl's               | 1657                                                                         |
| Refl's $I \geq 2\sigma(I)$   | 1318                                                                         |
| $R_{int}$                    | 0.0797                                                                       |
| Parameters                   | 164                                                                          |
| Restraints                   | 0                                                                            |
| Largest Peak                 | 0.325                                                                        |
| Deepest Hole                 | -0.318                                                                       |
| Goof                         | 1.077                                                                        |
| $wR_2$ (all data)            | 0.1229                                                                       |
| $wR_2$                       | 0.1107                                                                       |
| $R_1$ (all data)             | 0.0623                                                                       |
| $R_1$                        | 0.0452                                                                       |



Table S12. Single crystal X-ray data and structure refinement for compound 11.H<sub>2</sub>O.<sup>6-10</sup>

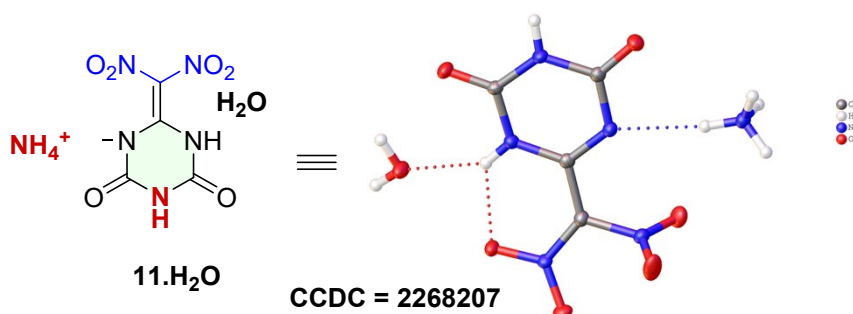

|                              |                                                                              |
|------------------------------|------------------------------------------------------------------------------|
| Formula                      | C <sub>4</sub> H <sub>8</sub> N <sub>6</sub> O <sub>7</sub> (CCDC = 2268207) |
| $D_{calc.}/\text{g cm}^{-3}$ | 1.788                                                                        |
| $m/\text{mm}^{-1}$           | 1.507                                                                        |
| Formula Weight               | 252.16                                                                       |
| Colour                       | yellow                                                                       |
| Shape                        | block-shaped                                                                 |
| Size/ $\text{mm}^3$          | 0.11×0.07×0.06                                                               |
| $T/\text{K}$                 | 100.00(10)                                                                   |
| Crystal System               | monoclinic                                                                   |
| Flack Parameter              | 0.6(4)                                                                       |
| Hooft Parameter              | 0.2(2)                                                                       |
| Space Group                  | <i>Ia</i>                                                                    |
| $a/\text{Å}$                 | 8.26070(10)                                                                  |
| $b/\text{Å}$                 | 9.13530(10)                                                                  |
| $c/\text{Å}$                 | 12.5011(2)                                                                   |
| $a^\circ$                    | 90                                                                           |
| $b^\circ$                    | 96.6790(10)                                                                  |
| $g^\circ$                    | 90                                                                           |
| $V/\text{Å}^3$               | 936.98(2)                                                                    |
| $Z$                          | 4                                                                            |
| $Z'$                         | 1                                                                            |
| Wavelength/Å                 | 1.54184                                                                      |
| Radiation type               | Cu K <sub><math>\alpha</math></sub>                                          |
| $Q_{min}^\circ$              | 6.014                                                                        |
| $Q_{max}^\circ$              | 80.141                                                                       |
| Measured Refl's.             | 5189                                                                         |
| Indep't Refl's               | 1465                                                                         |
| Refl's $I \geq 2\sigma(I)$   | 1424                                                                         |
| $R_{int}$                    | 0.0309                                                                       |
| Parameters                   | 187                                                                          |
| Restraints                   | 2                                                                            |
| Largest Peak                 | 0.148                                                                        |
| Deepest Hole                 | -0.218                                                                       |
| GooF                         | 1.065                                                                        |
| $wR_2$ (all data)            | 0.0765                                                                       |
| $wR_2$                       | 0.0756                                                                       |
| $R_1$ (all data)             | 0.0295                                                                       |
| $R_1$                        | 0.0286                                                                       |

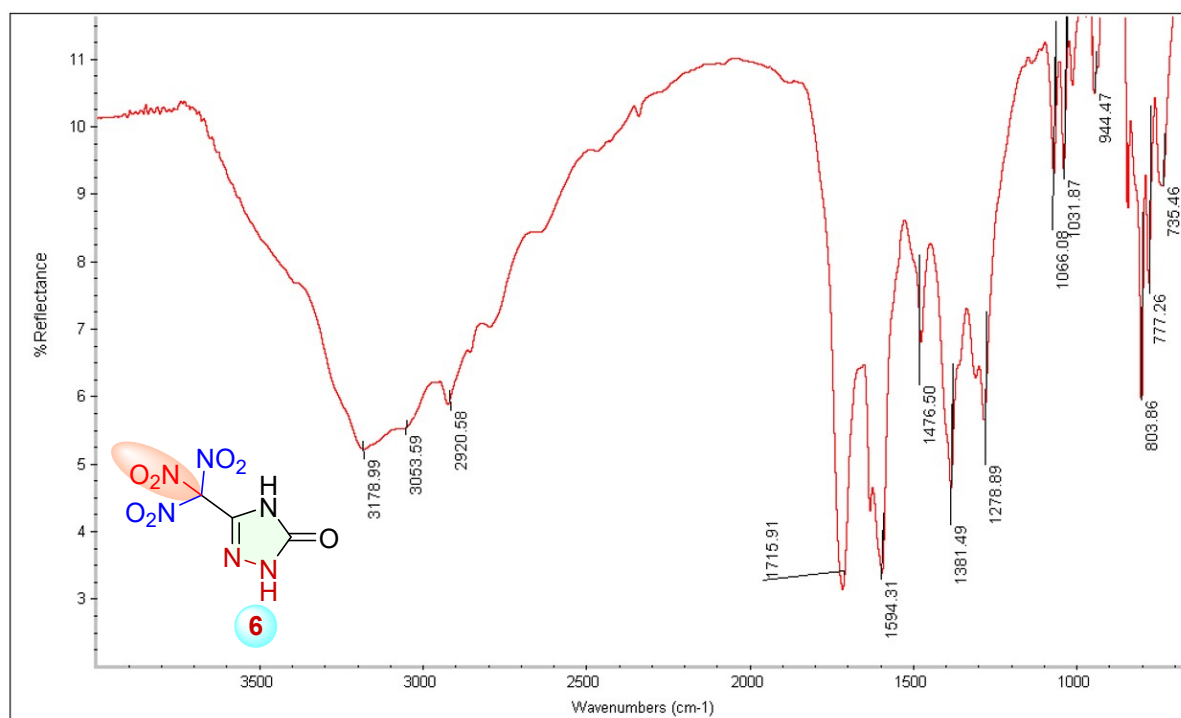

Fig. S10 FTIR-Spectrum of Compound 6.

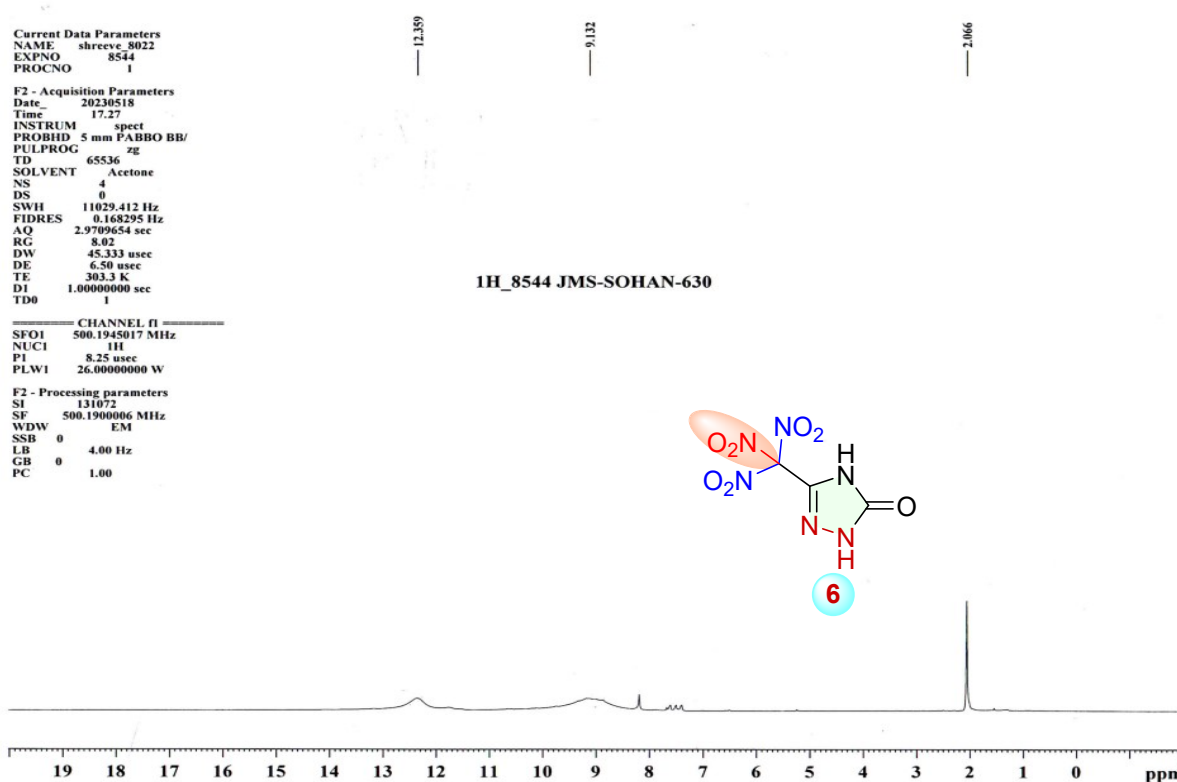

Fig. S11 <sup>1</sup>H NMR Spectrum of Compound 6 (500.19 MHz).

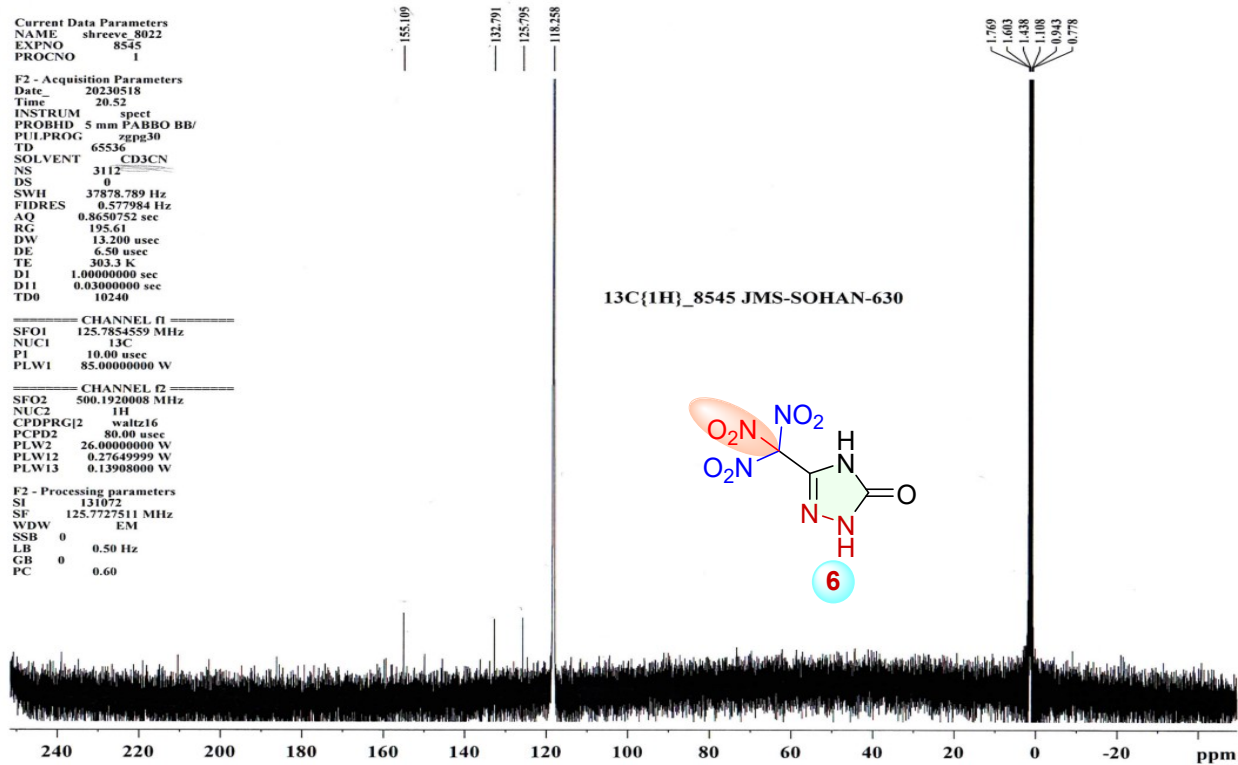

Fig. S12 <sup>13</sup>C NMR Spectrum of Compound 6 (125.77 MHz).

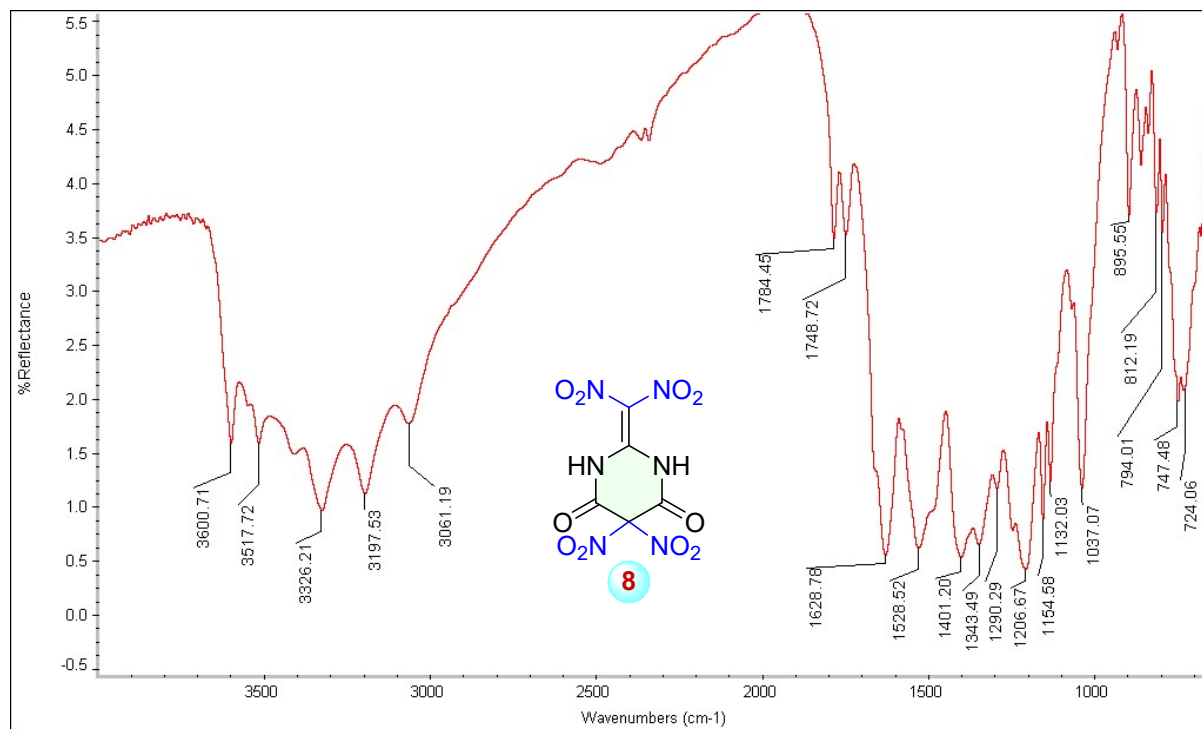

Fig. S13 FTIR-Spectrum of Compound 8.

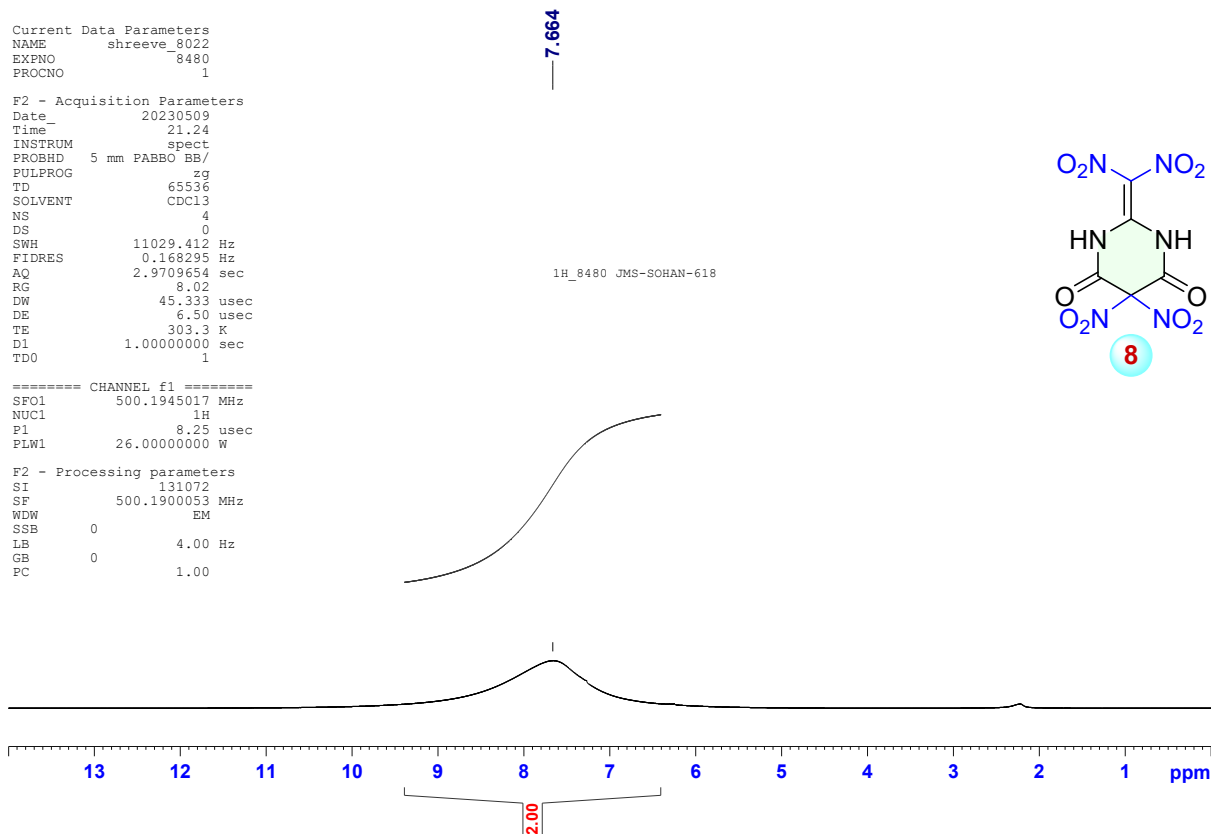

Fig. S14 <sup>1</sup>H NMR Spectrum of Compound 8 (500.19 MHz).

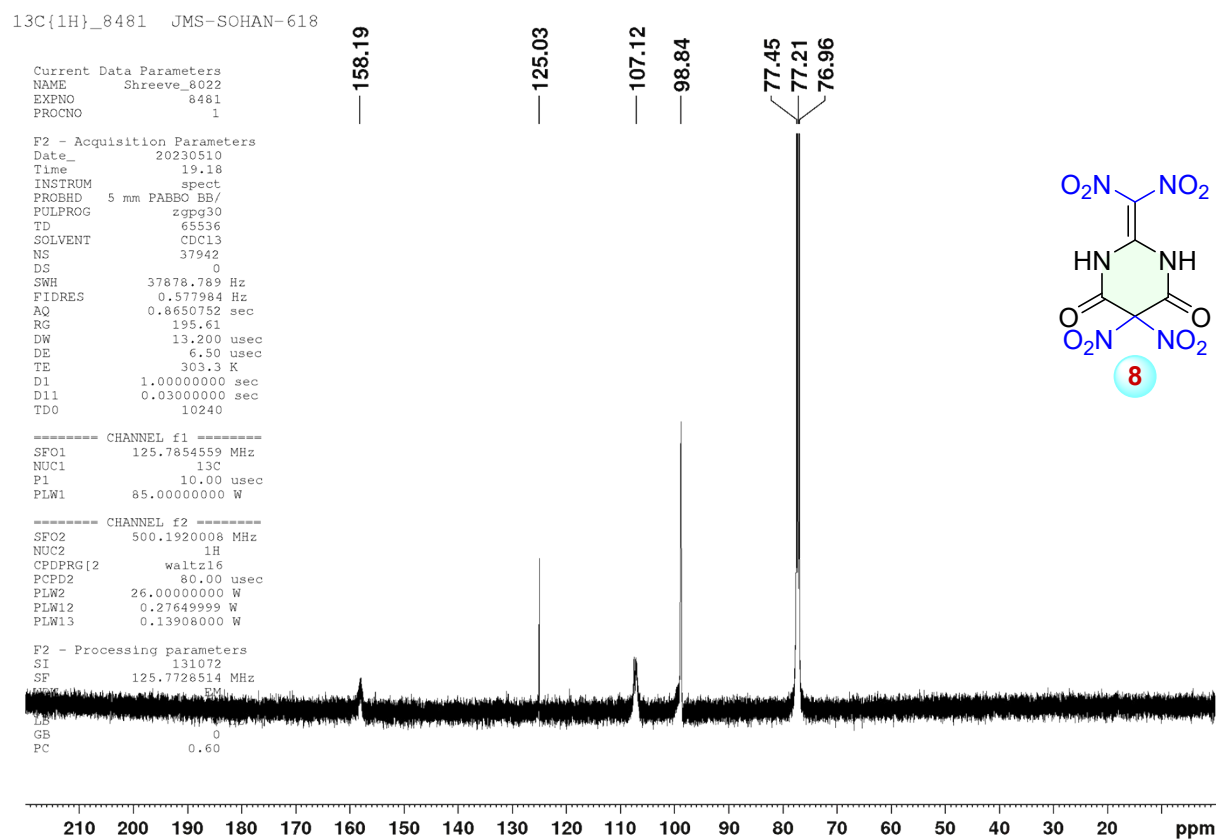

Fig. S15 <sup>13</sup>C NMR Spectrum of Compound 8 (125.77 MHz).

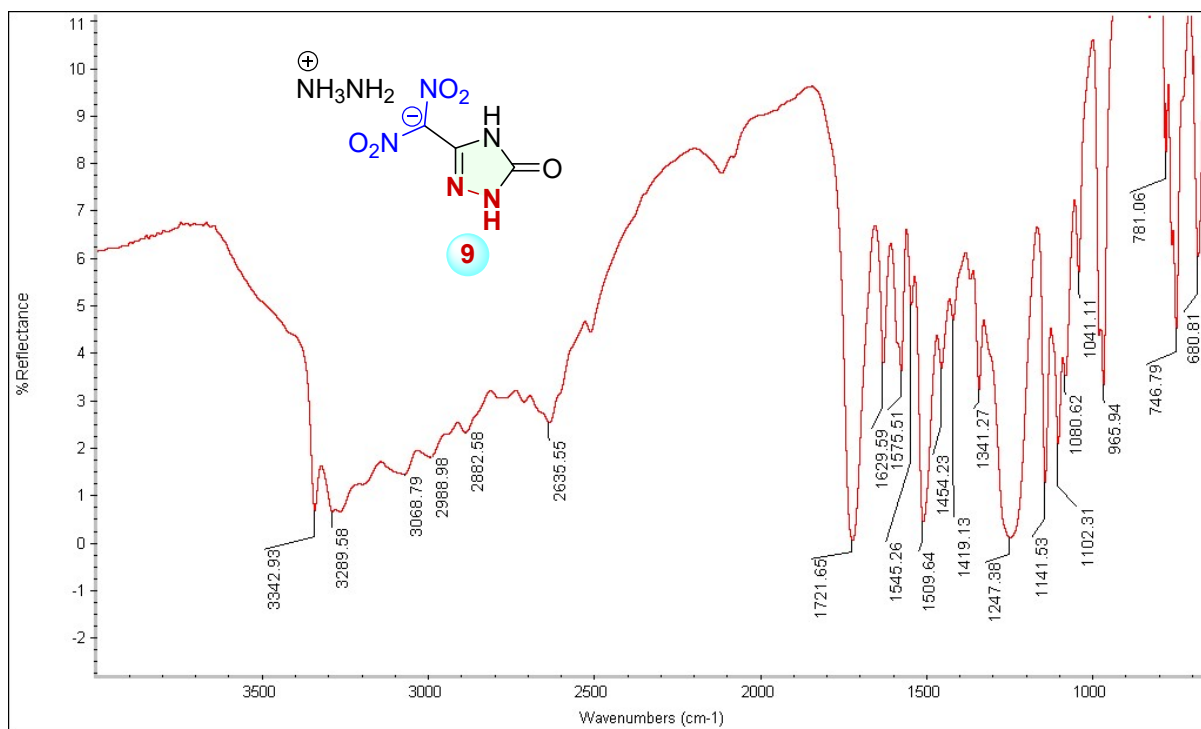

Fig. S16 FTIR-Spectrum of Compound 9.

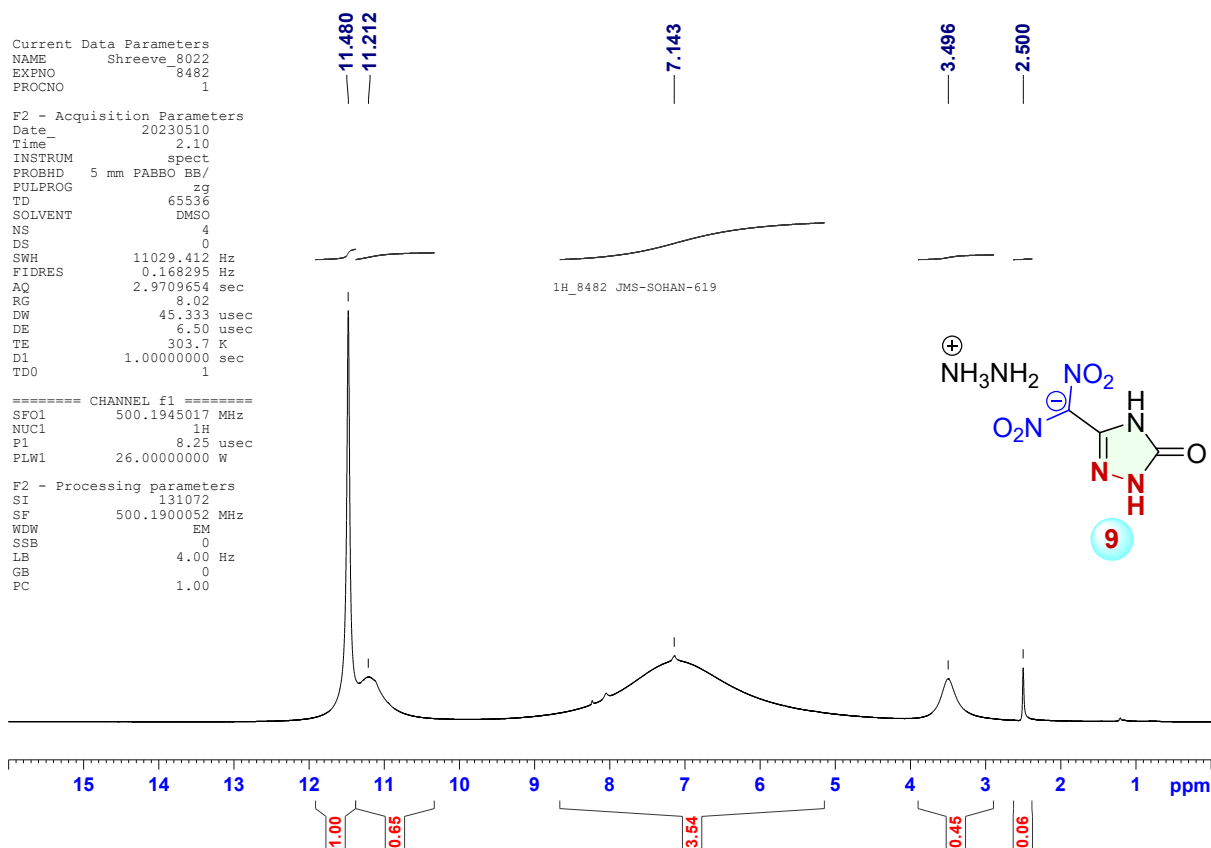

Fig. S17 <sup>1</sup>H NMR Spectrum of Compound 9 (500.19 MHz).

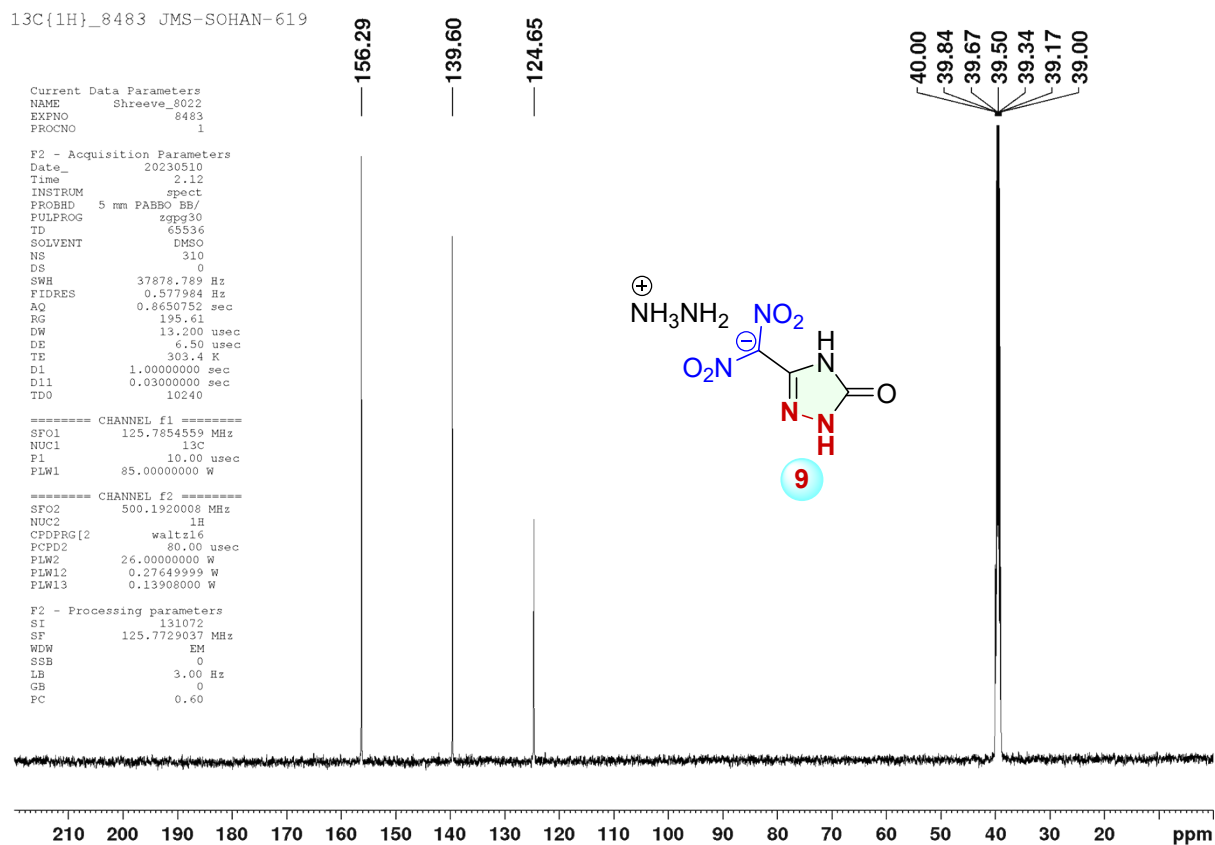

Fig. S18 <sup>13</sup>C NMR Spectrum of Compound 9 (125.77 MHz).

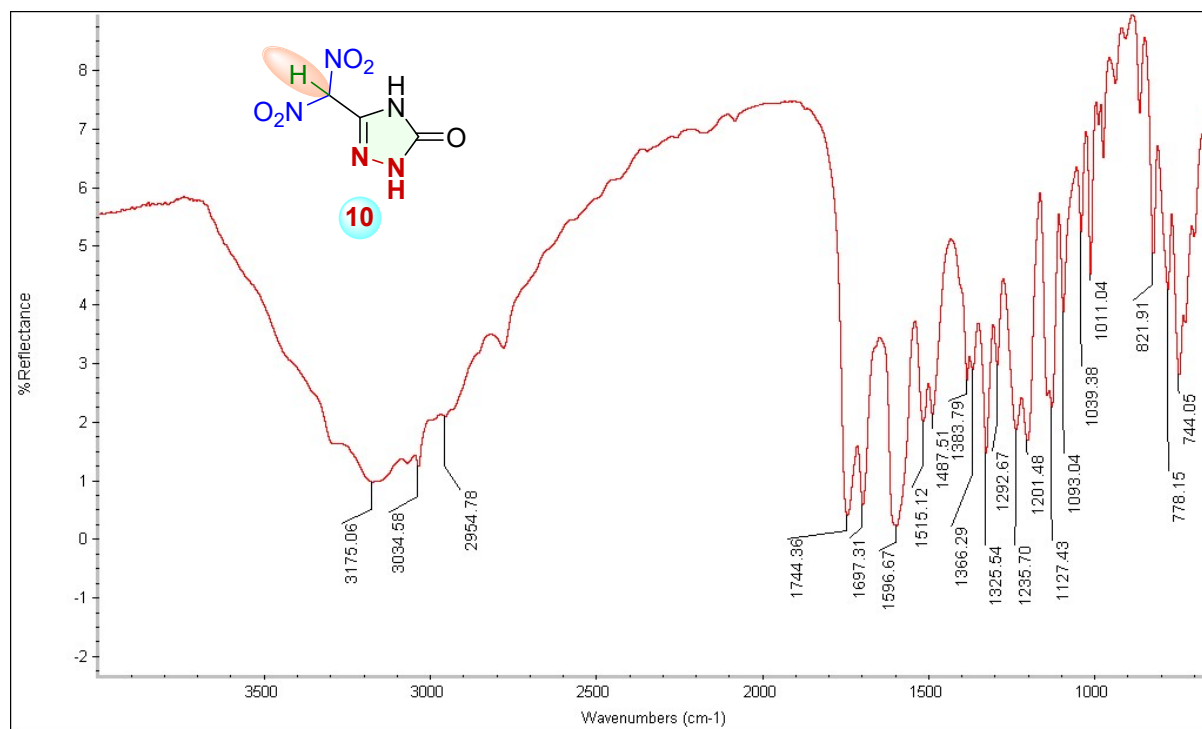

Fig. S19 FTIR-Spectrum of Compound 10.

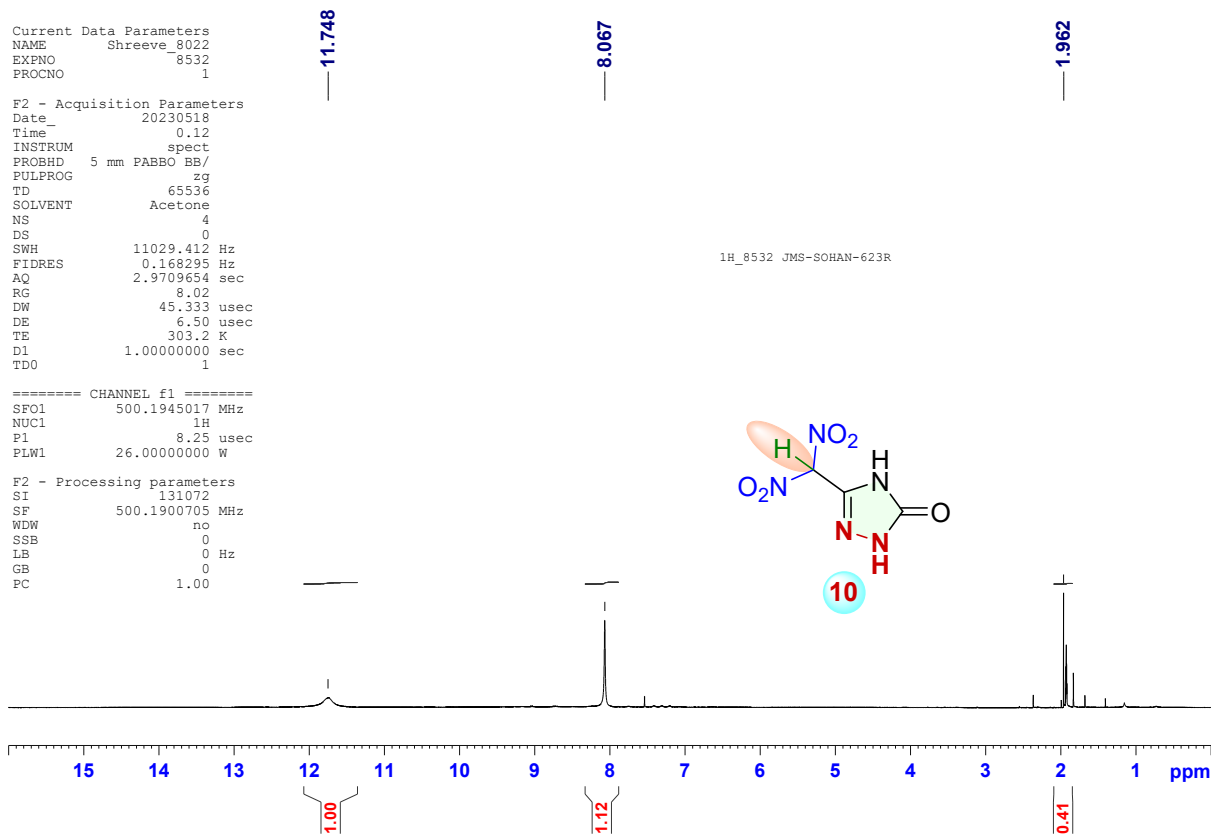

Fig. S20 <sup>1</sup>H NMR Spectrum of Compound 10 (500.19 MHz).

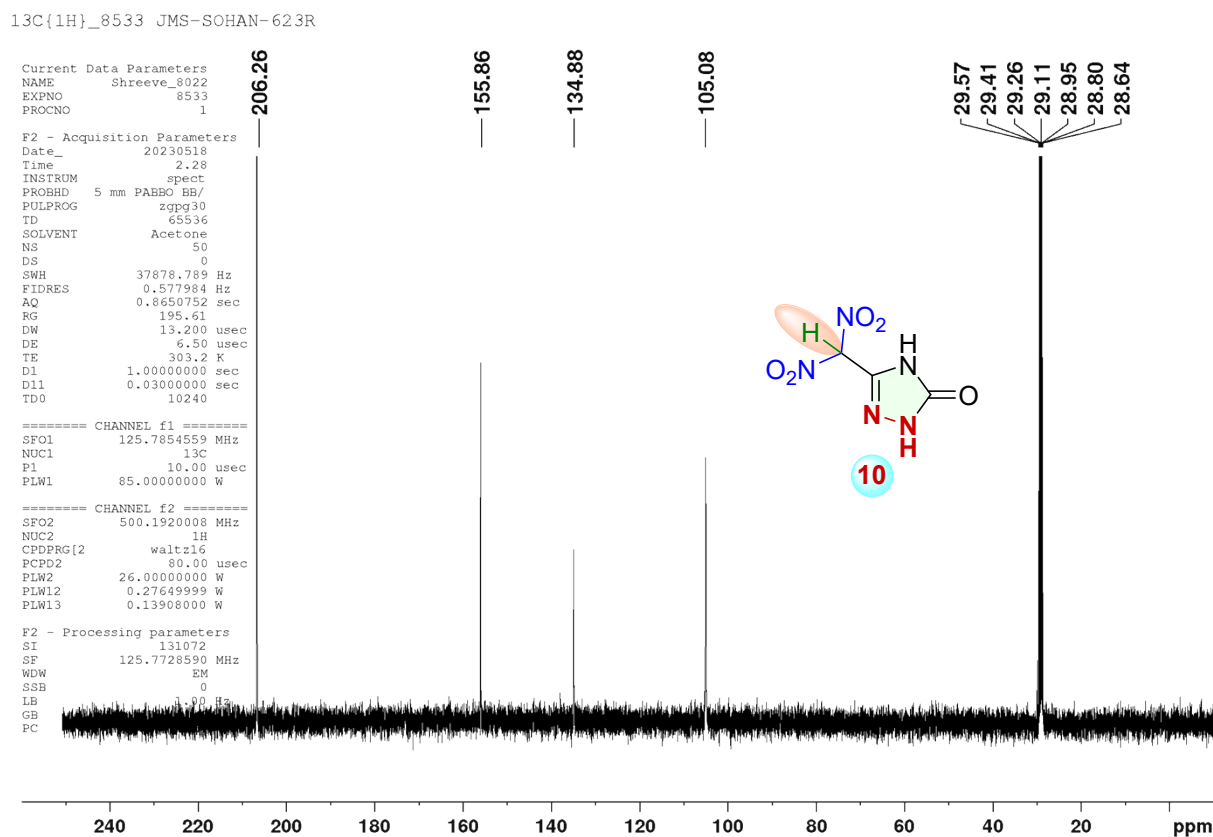

Fig. S21 <sup>13</sup>C NMR Spectrum of Compound 10 (125.77 MHz).

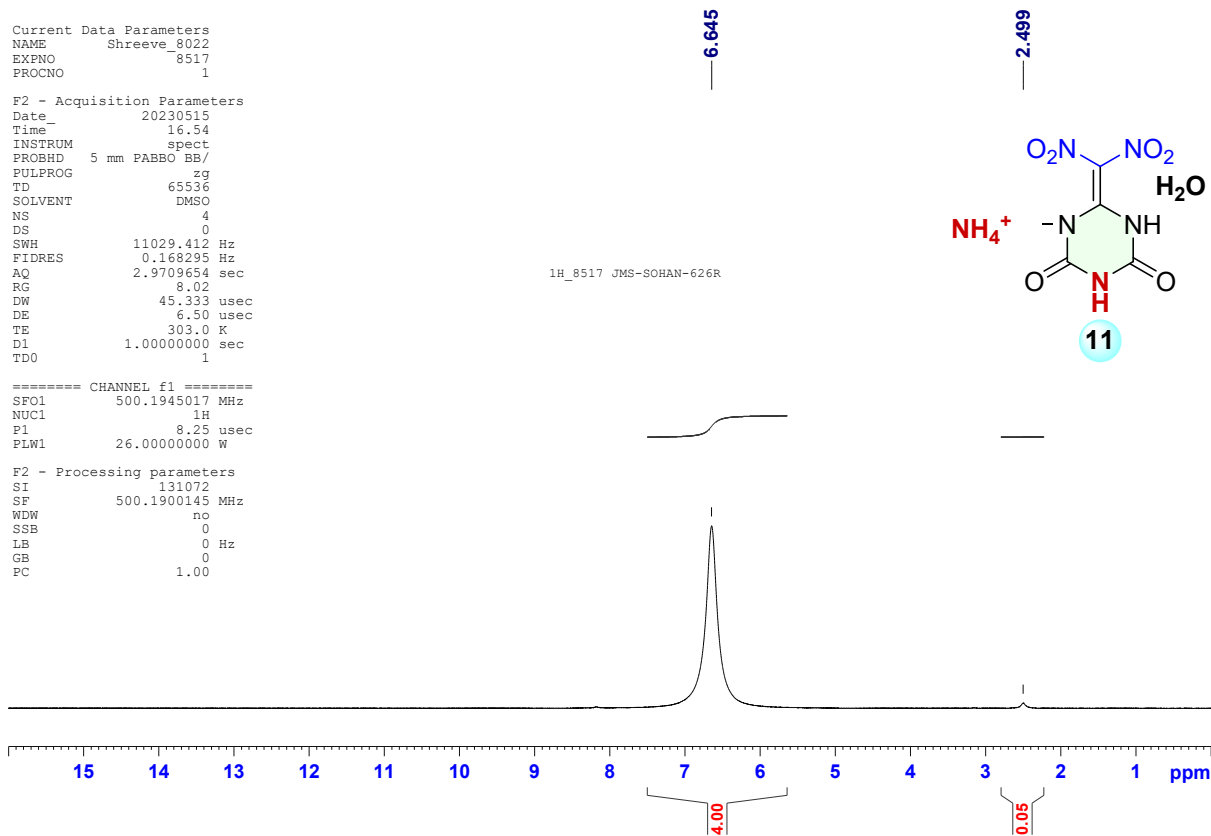

Fig. S22 <sup>1</sup>H NMR Spectrum of Compound 11.H<sub>2</sub>O (500.19 MHz).

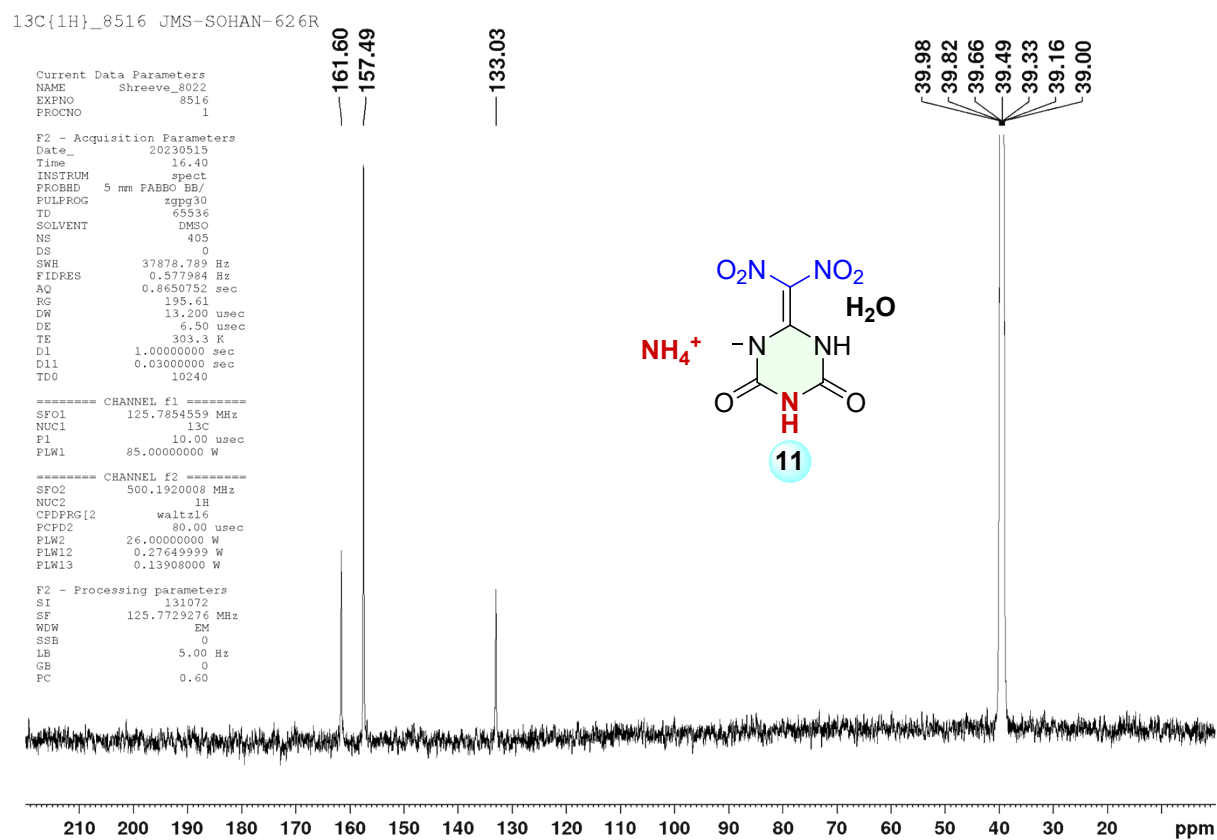

Fig. S23 <sup>13</sup>C NMR Spectrum of Compound 11.H<sub>2</sub>O (125.77 MHz).



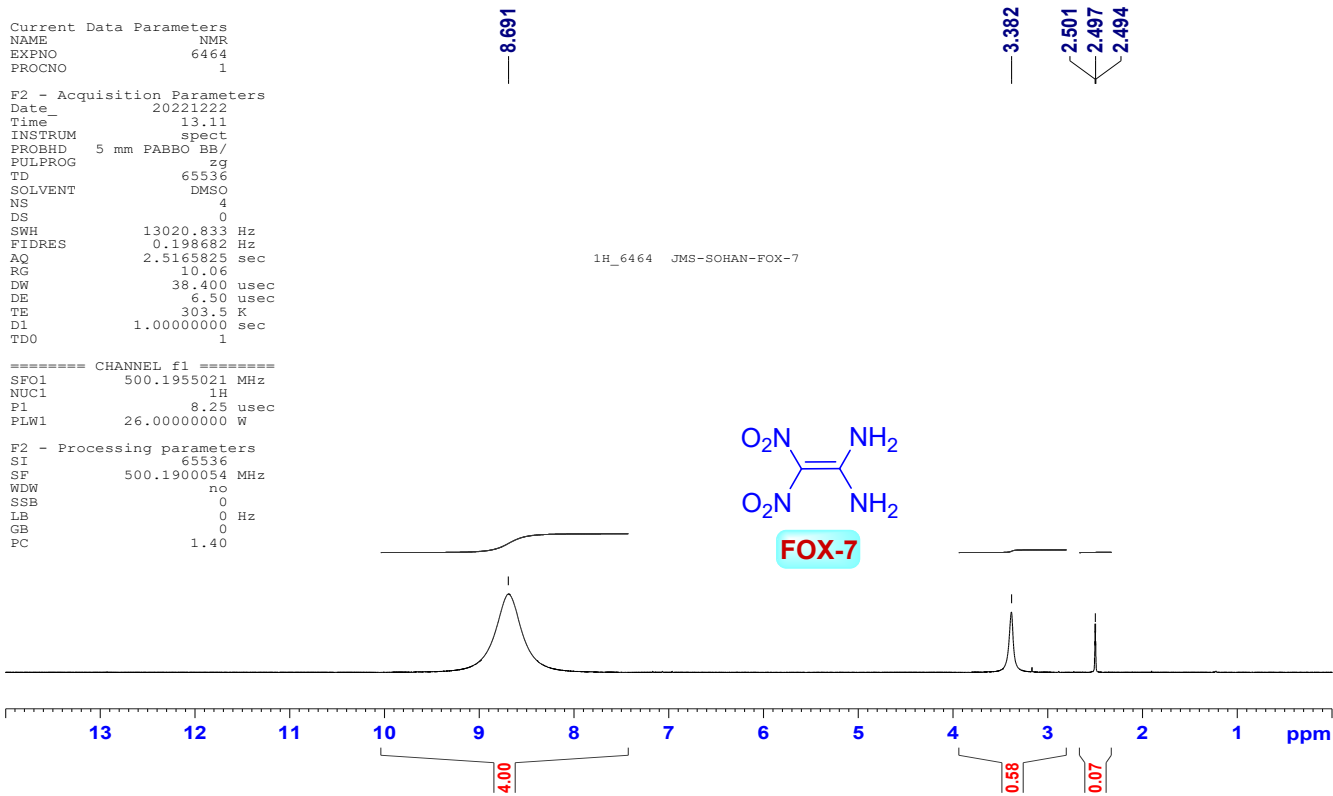

Fig. S24 <sup>1</sup>H NMR Spectrum of FOX-7 (500.19 MHz).

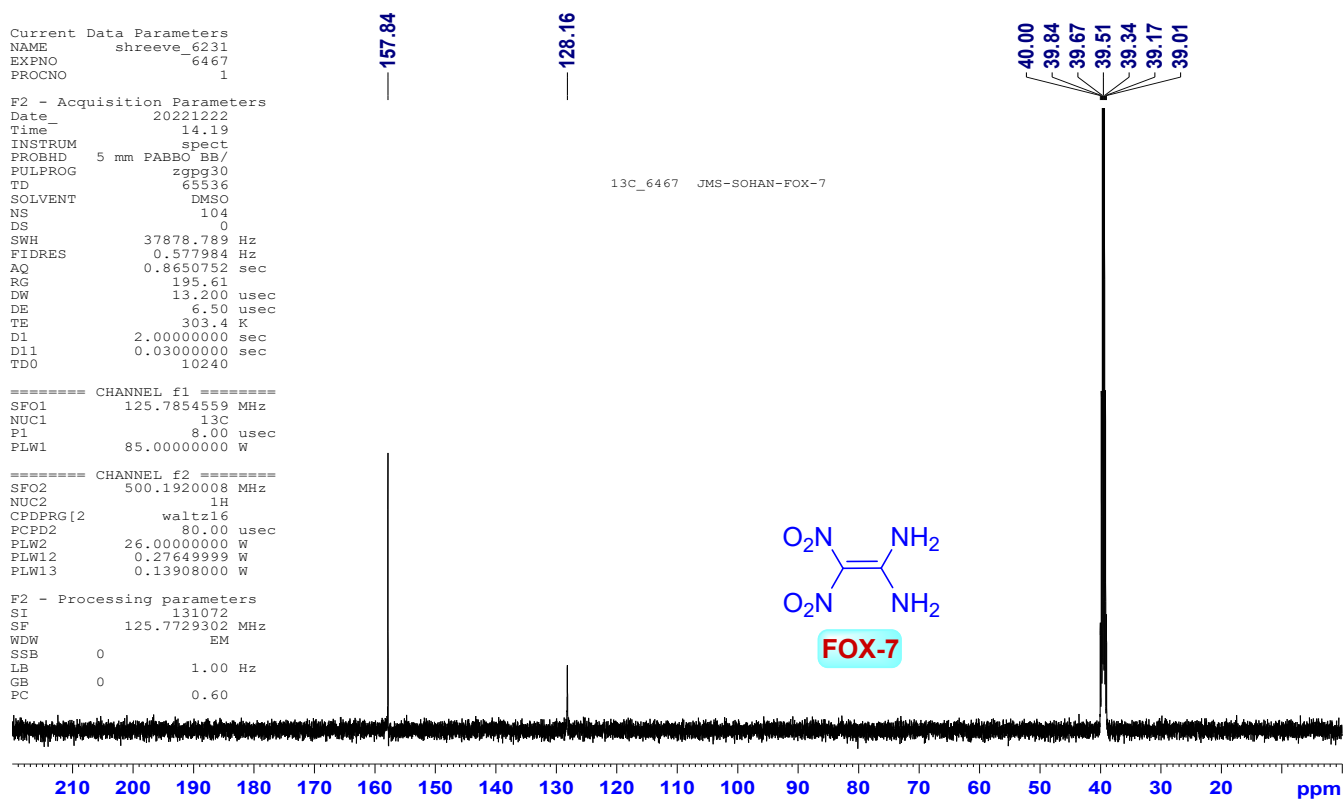

Fig. S25 <sup>13</sup>C NMR Spectrum of FOX-7 (125.77 MHz).

Sample: SOHAN-630 R at 5°C  
Size: 0.1000 mg  
Method: Ramp

DSC

File: C:\DSC\SOHAN\SOHAN-630 R at 5°C.002  
Operator: SOHAN  
Run Date: 05-Jun-2023 00:06  
Instrument: DSC Q2000 V24.11 Build 124

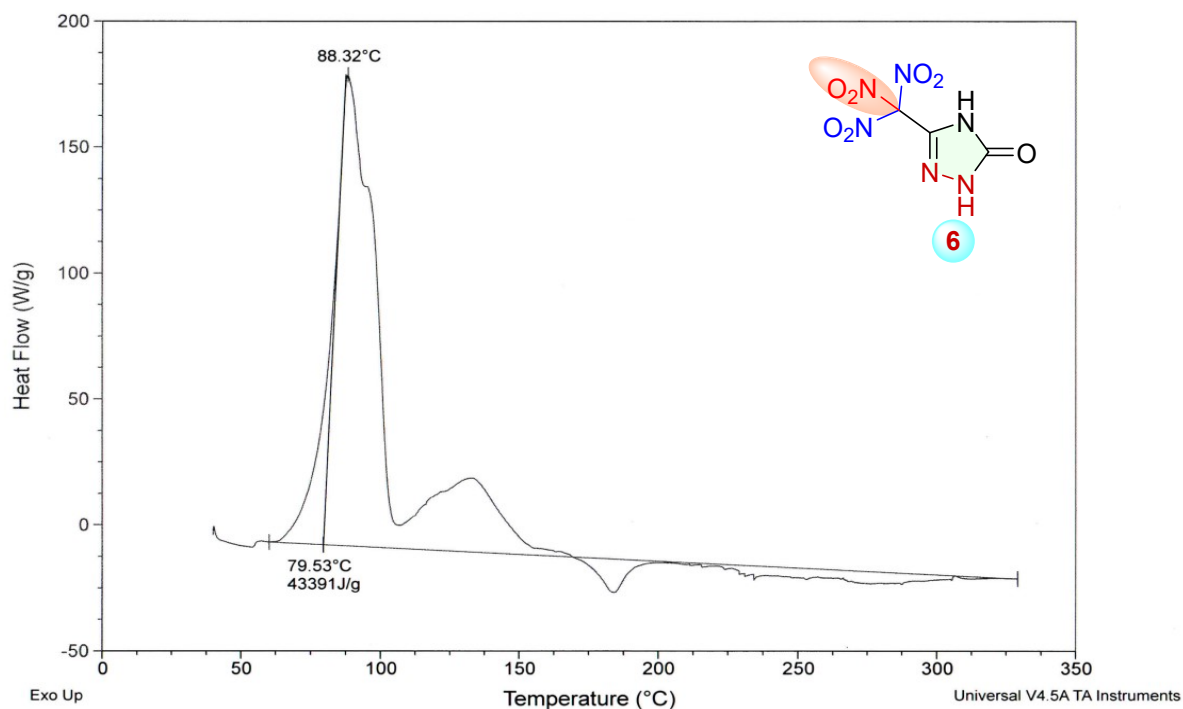

Fig. S26 DSC of compound 6 at 5 °C min<sup>-1</sup>

Sample: SOHAN-630RRR at 10°C  
Size: 0.1000 mg  
Method: Ramp

DSC

File: C:\DSC\SOHAN\SOHAN-630RRR at 10°C.C  
Operator: SOHAN  
Run Date: 25-May-2023 11:04  
Instrument: DSC Q2000 V24.11 Build 124

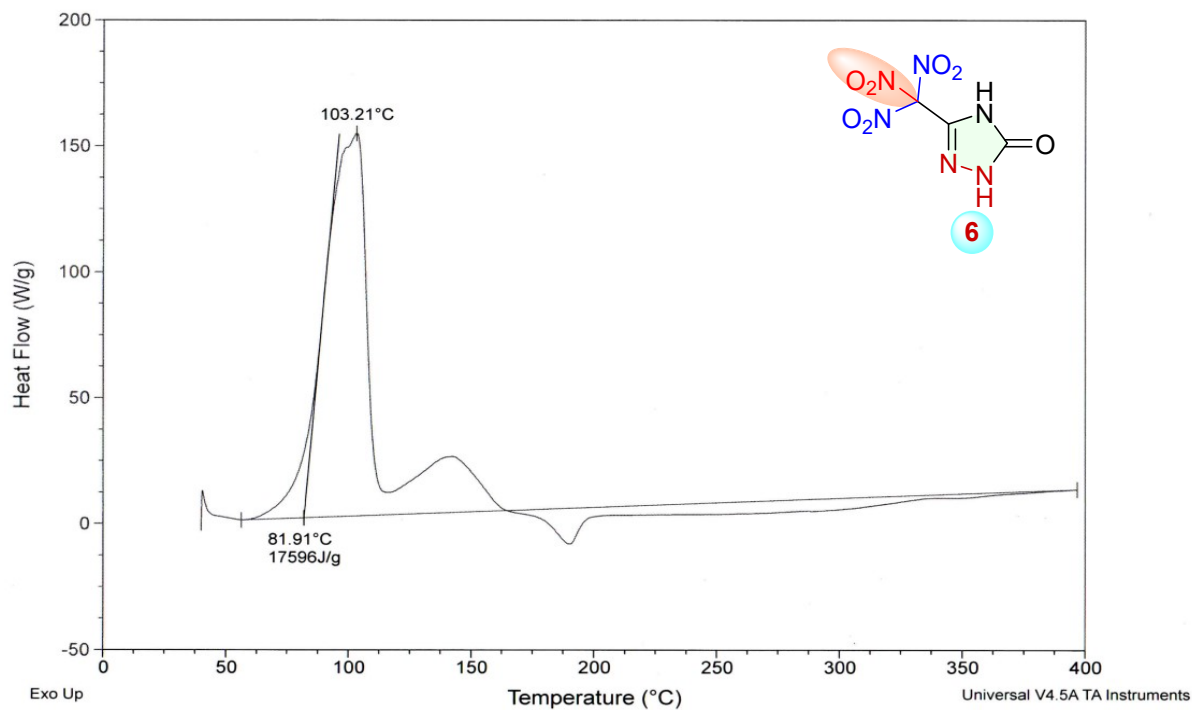

Fig. S27 DSC of compound 6 at 10 °C min<sup>-1</sup>

Sample: SOHAN-618R at 5°C  
Size: 0.1000 mg  
Method: Ramp

DSC

File: C:\DSC\SOHAN\SOHAN-618R at 5°C.001  
Operator: SOHAN  
Run Date: 09-May-2023 22:32  
Instrument: DSC Q2000 V24.11 Build 124

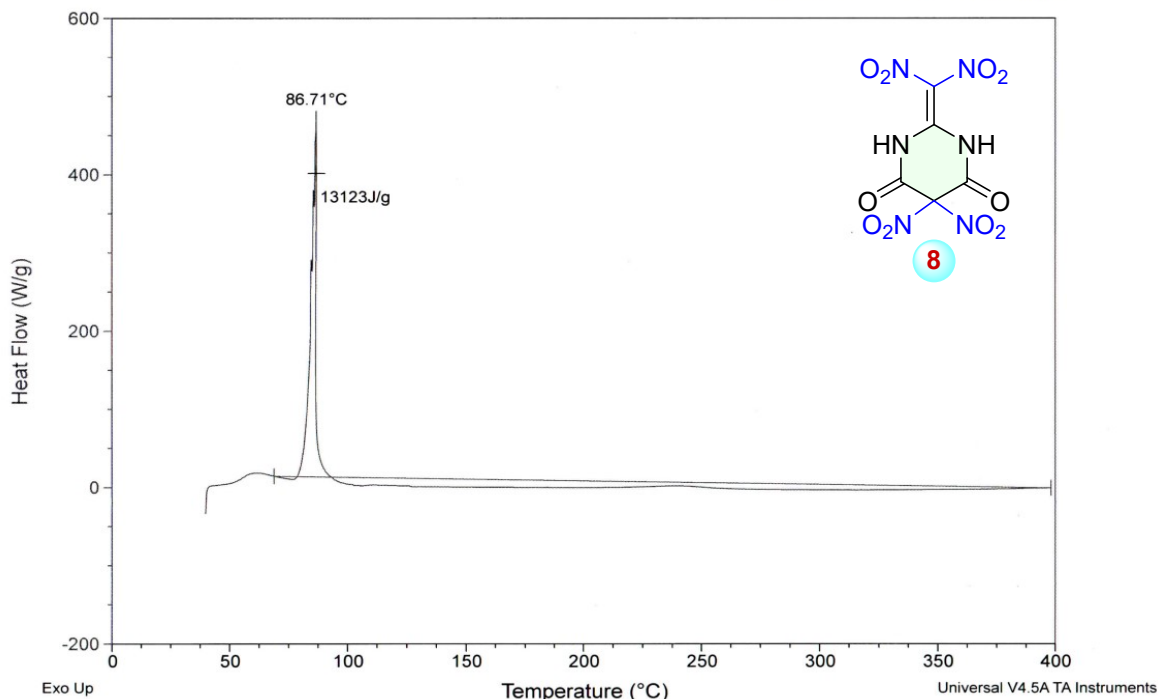

Fig. S28 DSC of compound 8 at 5 °C min<sup>-1</sup>

Sample: SOHAN-618R at 10°C  
Size: 0.1000 mg  
Method: Ramp

DSC

File: C:\DSC\SOHAN\SOHAN-618R at 10°C.001  
Operator: SOHAN  
Run Date: 09-May-2023 21:44  
Instrument: DSC Q2000 V24.11 Build 124

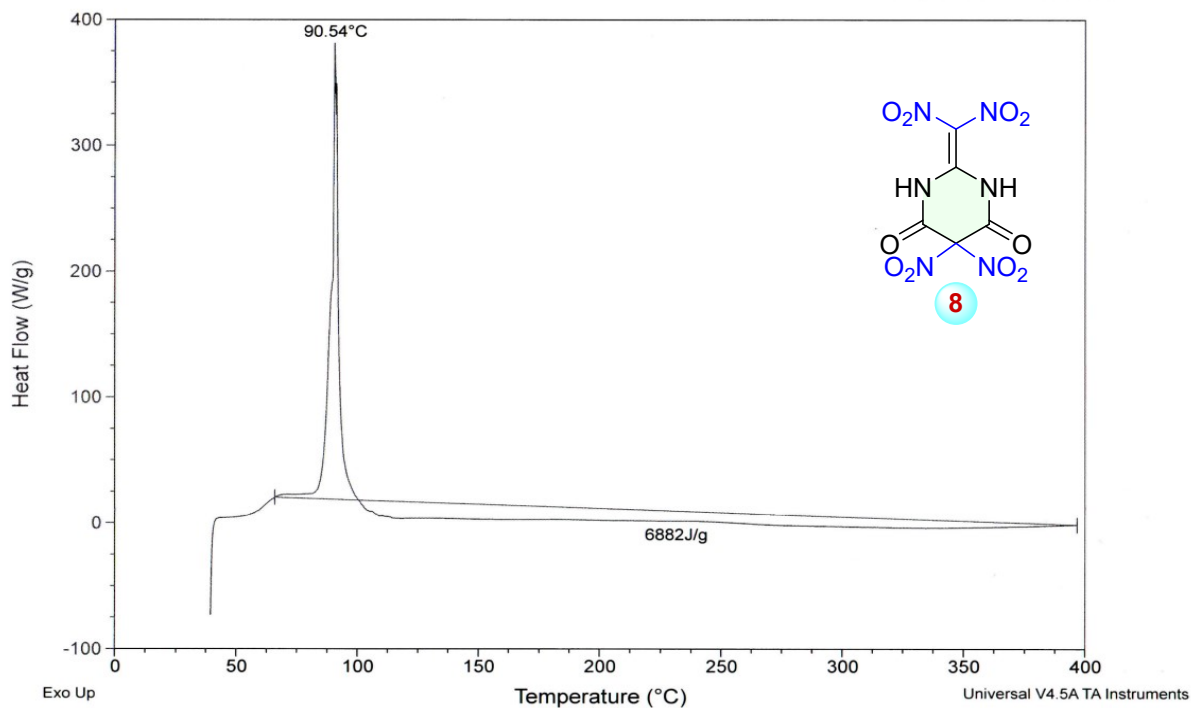

Fig. S29 DSC of compound 8 at 10 °C min<sup>-1</sup>

Sample: SOHAN-619 at 5°C  
Size: 0.1000 mg  
Method: Ramp

DSC

File: C:\DSC\SOHAN\SOHAN-619 at 5°C.001  
Operator: SOHAN  
Run Date: 10-May-2023 11:03  
Instrument: DSC Q2000 V24.11 Build 124

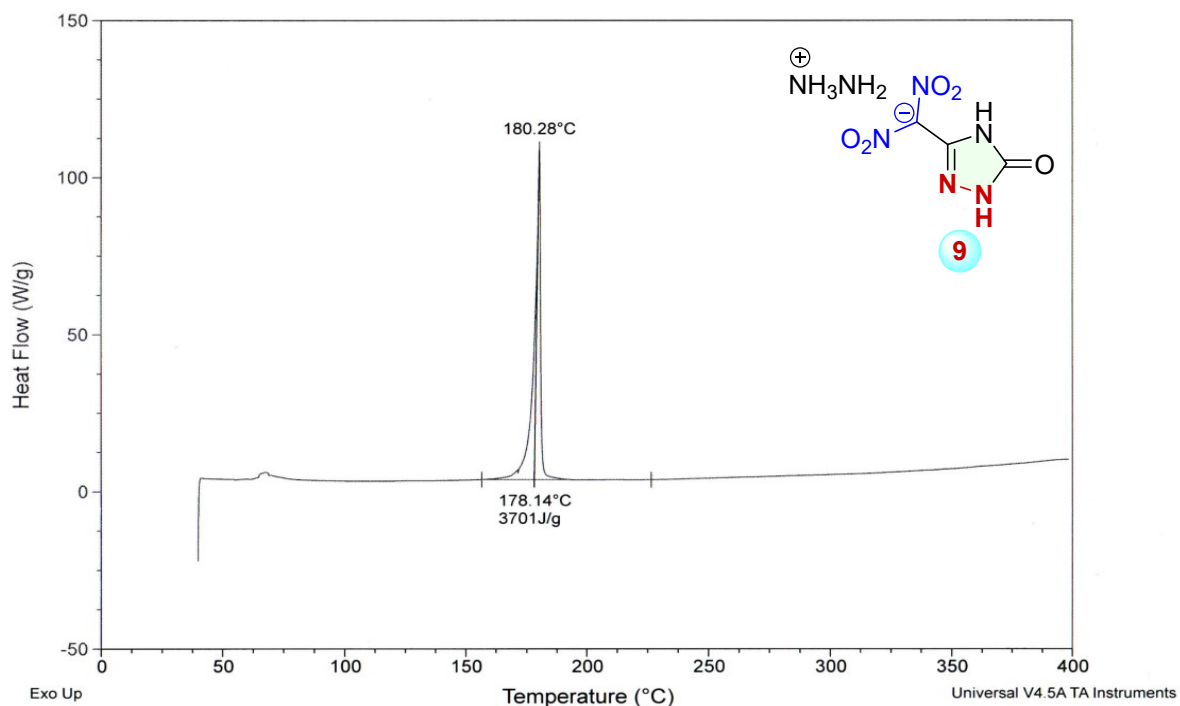

Fig. S30 DSC of compound 9 at 5 °C min<sup>-1</sup>

Sample: SOHAN-619 at 10°C  
Size: 0.1000 mg  
Method: Ramp

DSC

File: C:\DSC\SOHAN\SOHAN-619 at 10°C.001  
Operator: SOHAN  
Run Date: 10-May-2023 00:01  
Instrument: DSC Q2000 V24.11 Build 124

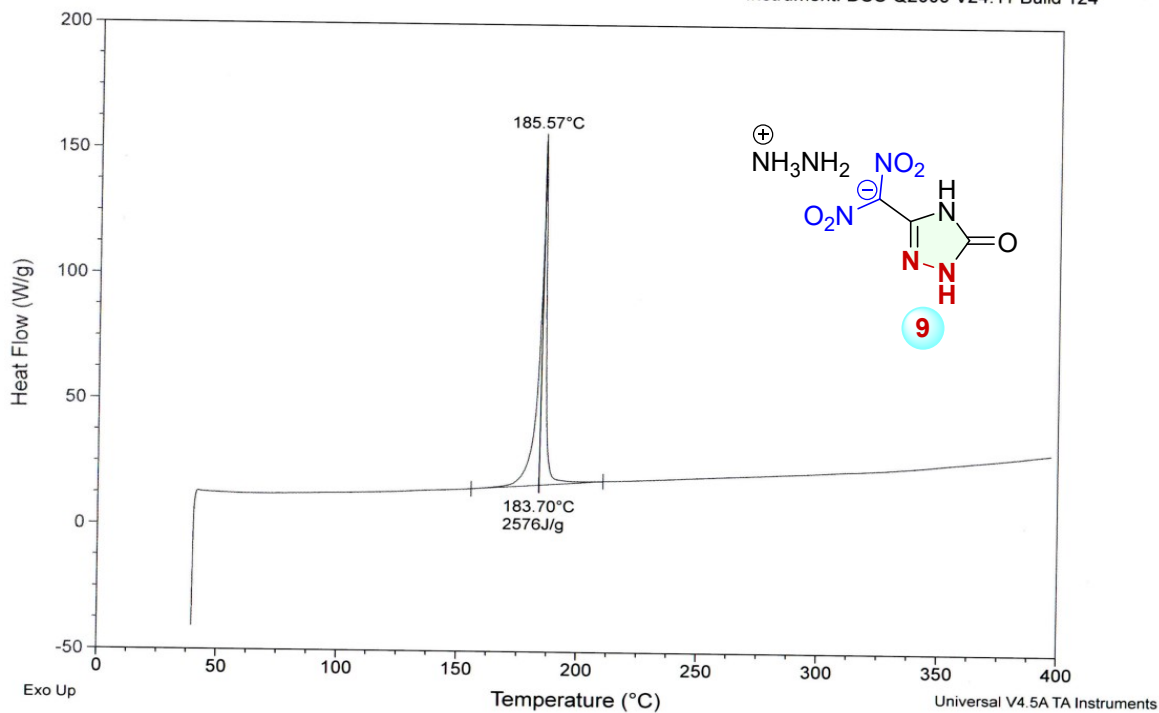

Fig. S31 DSC of compound 8 at 10 °C min<sup>-1</sup>

Sample: SOHAN-623RR at 5°C  
Size: 0.1000 mg  
Method: Ramp

DSC

File: C:\...\DSC\SOHAN\SOHAN-623RR at 5°C.001  
Operator: SOHAN  
Run Date: 23-May-2023 17:25  
Instrument: DSC Q2000 V24.11 Build 124

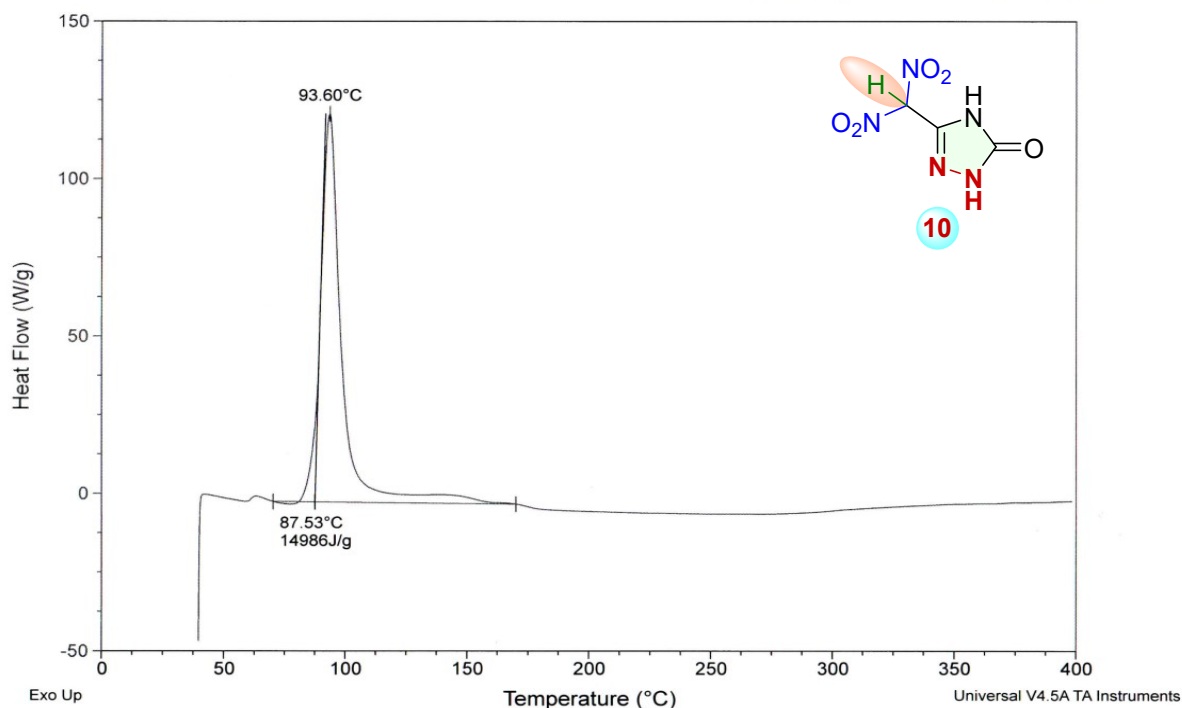

Fig. S32 DSC of compound 10 at 5 °C min<sup>-1</sup>

Sample: SOHAN-623RR at 10°C  
Size: 0.1000 mg  
Method: Ramp

DSC

File: C:\...\DSC\SOHAN\SOHAN-623RR at 10°C.00  
Operator: SOHAN  
Run Date: 23-May-2023 20:24  
Instrument: DSC Q2000 V24.11 Build 124

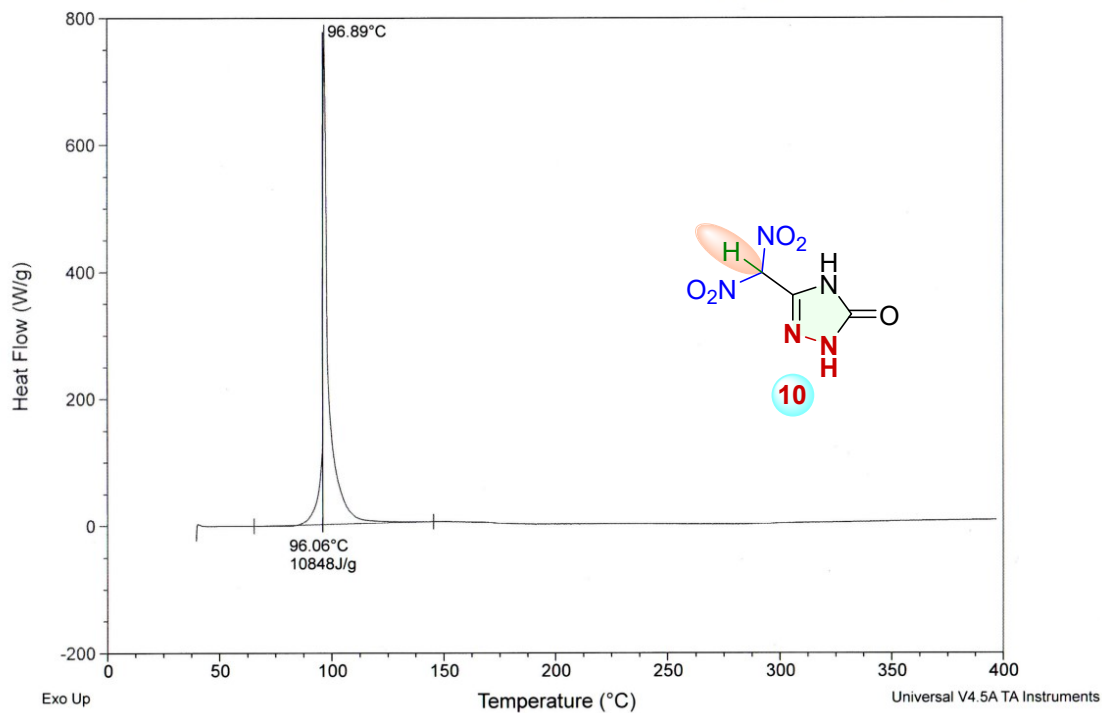

Fig. S33 DSC of compound 10 at 10 °C min<sup>-1</sup>

Sample: SOHAN-626R at 5°C  
Size: 0.1000 mg  
Method: Ramp

DSC

File: C:\DSC\SOHAN\SOHAN-626R at 5°C.001  
Operator: SOHAN  
Run Date: 06-Jun-2023 17:28  
Instrument: DSC Q2000 V24.11 Build 124

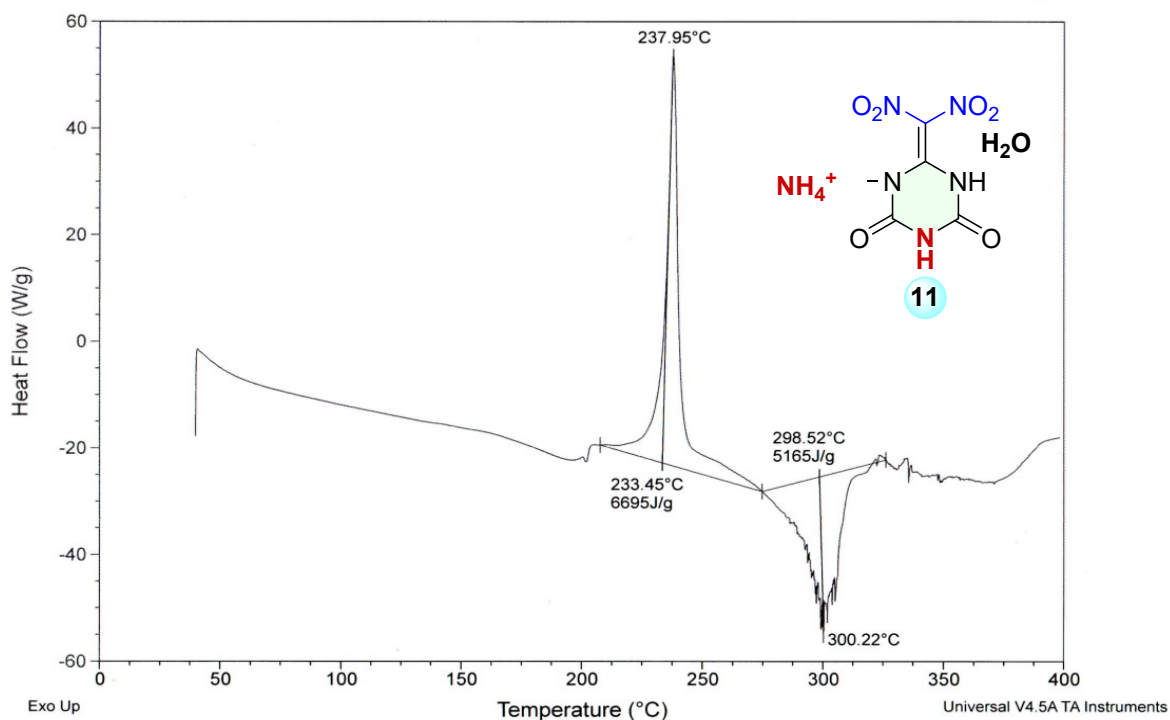

Fig. S34 DSC of compound 11.H<sub>2</sub>O at 5 °C min<sup>-1</sup>

Sample: SOHAN-FOX-7 at 5°C  
Size: 0.1000 mg  
Method: Ramp  
Comment: Cell constant calibration

DSC

File: C:\DSC\SOHAN\SOHAN-FOX-7 at 5°C.001  
Operator: SOHAN  
Run Date: 19-Dec-2022 17:52  
Instrument: DSC Q2000 V24.11 Build 124

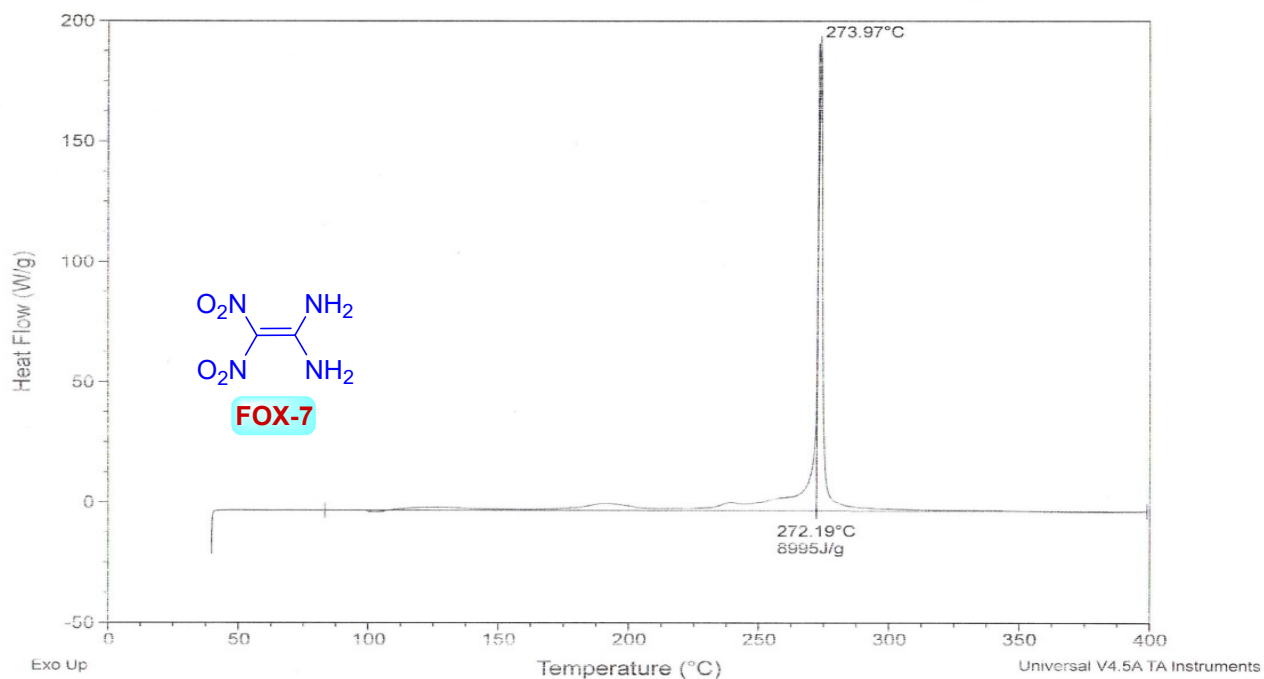

Fig. S35 DSC of compound FOX-7 at 5 °C min<sup>-1</sup>

Sample: SOHAN-630 at 5°C  
Size: 2.6780 mg  
Method: Ramp

TGA

File: C:\...TGA\Sohan\SOHAN-630 at 5°C.001  
Operator: SOHAN  
Run Date: 05-Jun-2023 00:38  
Instrument: TGA Q50 V20.13 Build 39

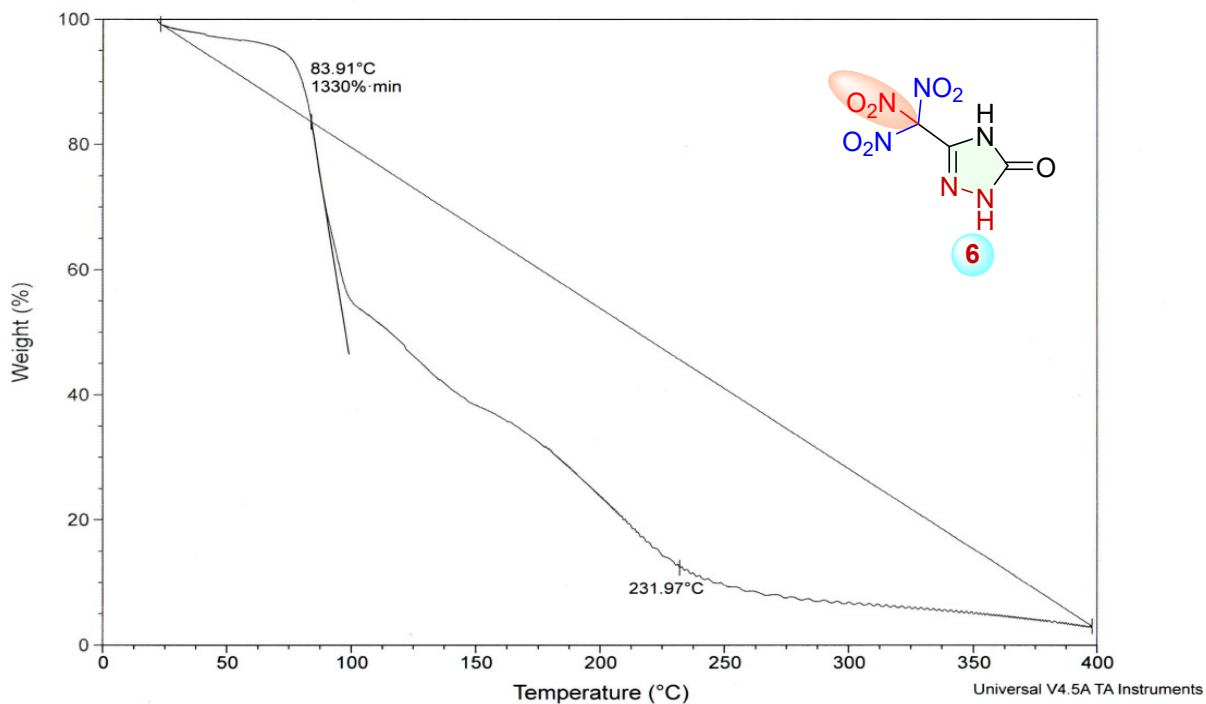

Fig. S36 TGA of compound 6 at 5 °C min<sup>-1</sup>

Sample: SOHAN-618R at 5°C  
Size: 2.1190 mg  
Method: Ramp

TGA

File: C:\...TGA\Sohan\SOHAN-618R at 5°C.001  
Operator: SOHAN  
Run Date: 09-May-2023 22:53  
Instrument: TGA Q50 V20.13 Build 39

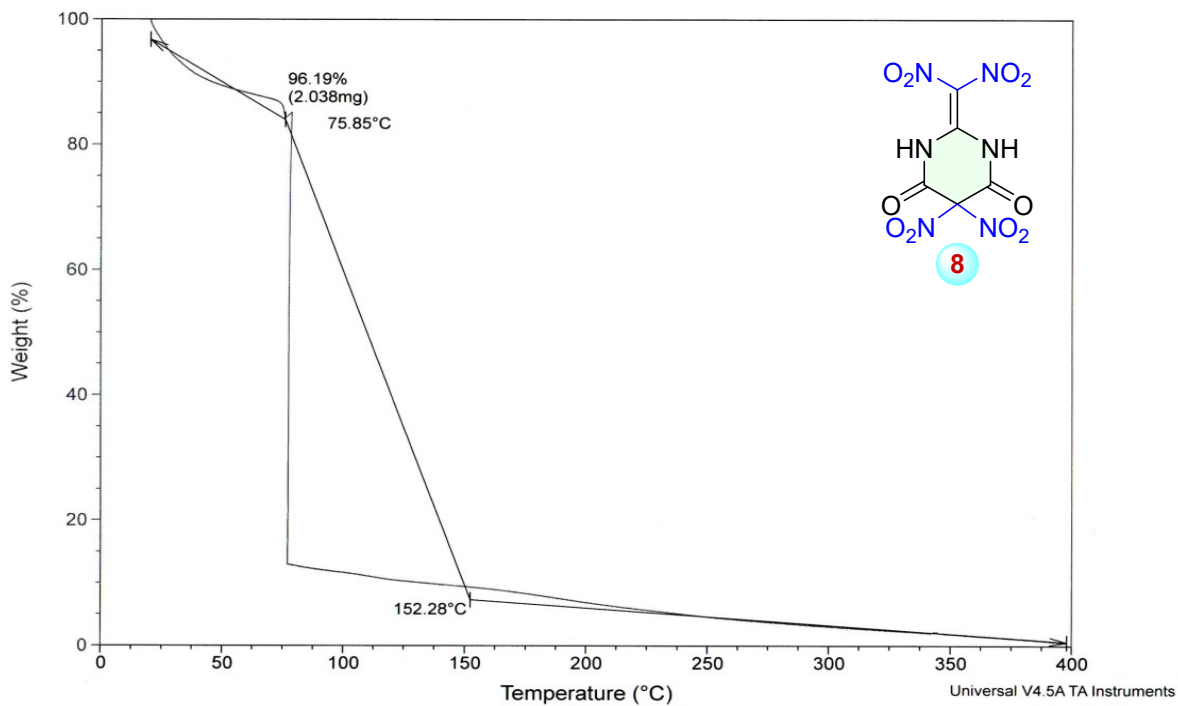

Fig. S37 TGA of compound 8 at 5 °C min<sup>-1</sup>

Sample: SOHAN-619 at 5°C  
Size: 1.8150 mg  
Method: Ramp

TGA

File: C:\...TGA\SOHAN\SOHAN-619 at 5°C.001  
Operator: SOHAN  
Run Date: 10-May-2023 12:34  
Instrument: TGA Q50 V20.13 Build 39

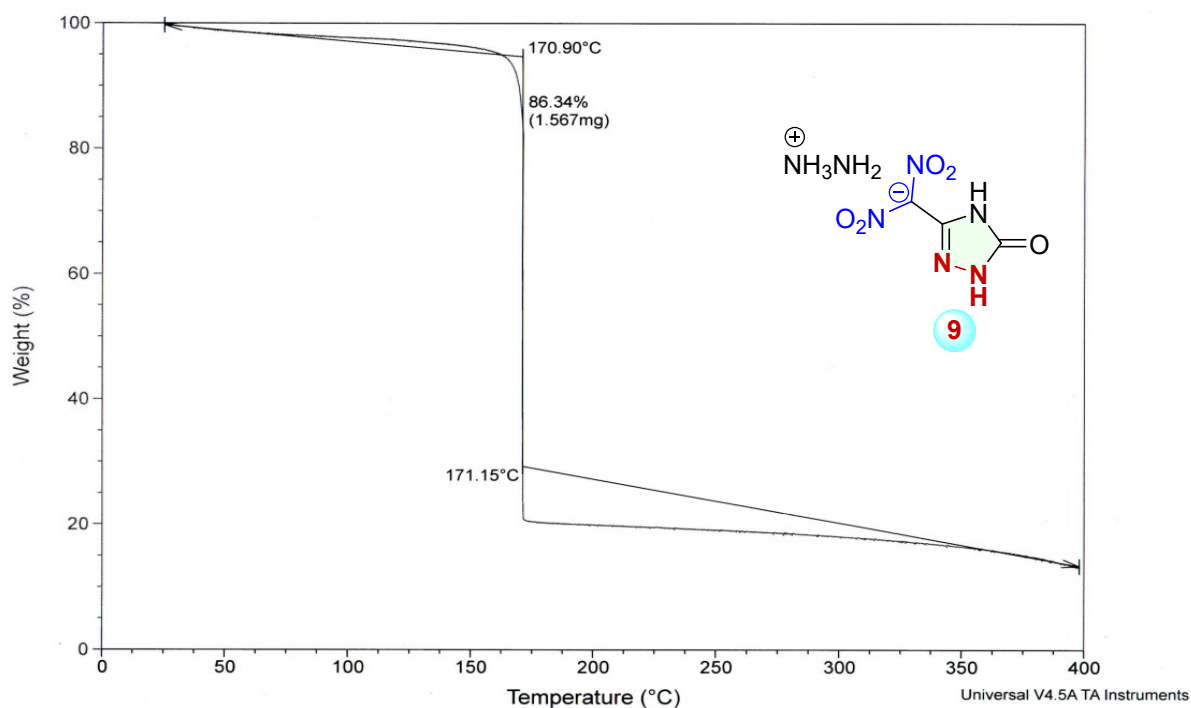

Fig. S38 TGA of compound 9 at 5 °C min<sup>-1</sup>

Sample: SOHAN-619 at 10°C  
Size: 2.2290 mg  
Method: Ramp

TGA

File: C:\...TGA\SOHAN\SOHAN-619 at 10°C.001  
Operator: SOHAN  
Run Date: 10-May-2023 11:17  
Instrument: TGA Q50 V20.13 Build 39

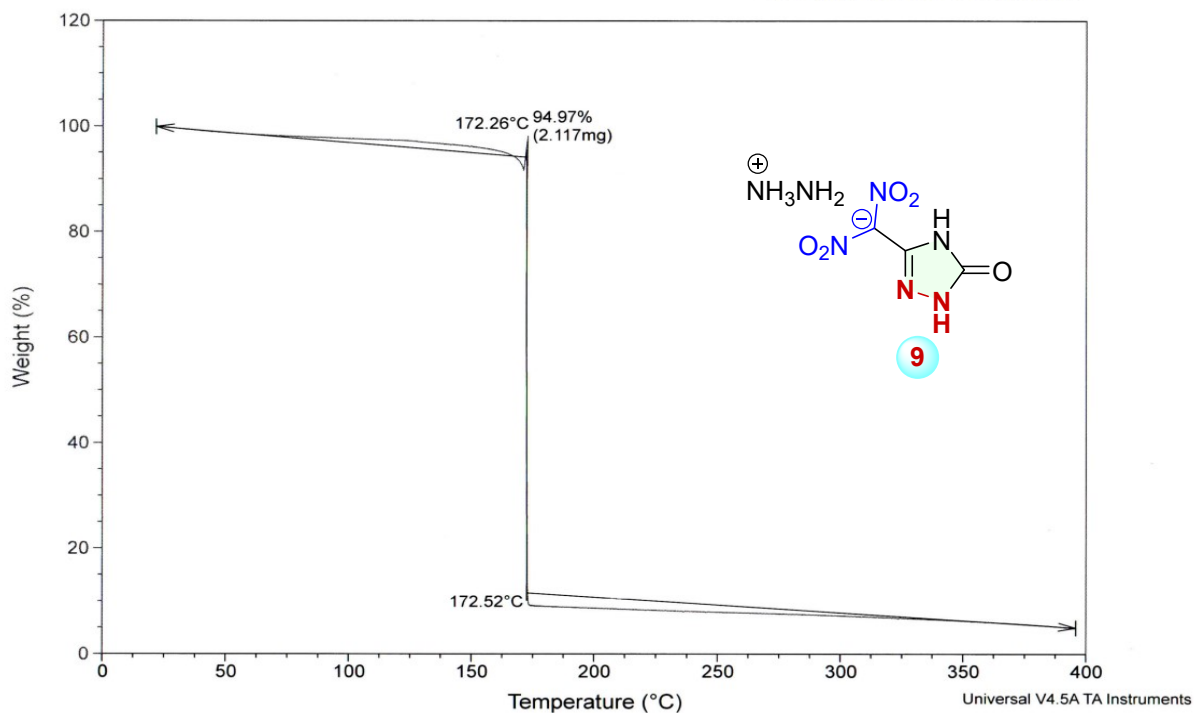

Fig. S39 TGA of compound 9 at 5 °C min<sup>-1</sup>



Sample: SOHAN-623RR at 10°C  
Size: 1.9220 mg  
Method: Ramp

TGA

File: C:\...TGA\Sohan\SOHAN-623RR at 10°C.001  
Operator: SOHAN  
Run Date: 23-May-2023 20:35  
Instrument: TGA Q50 V20.13 Build 39

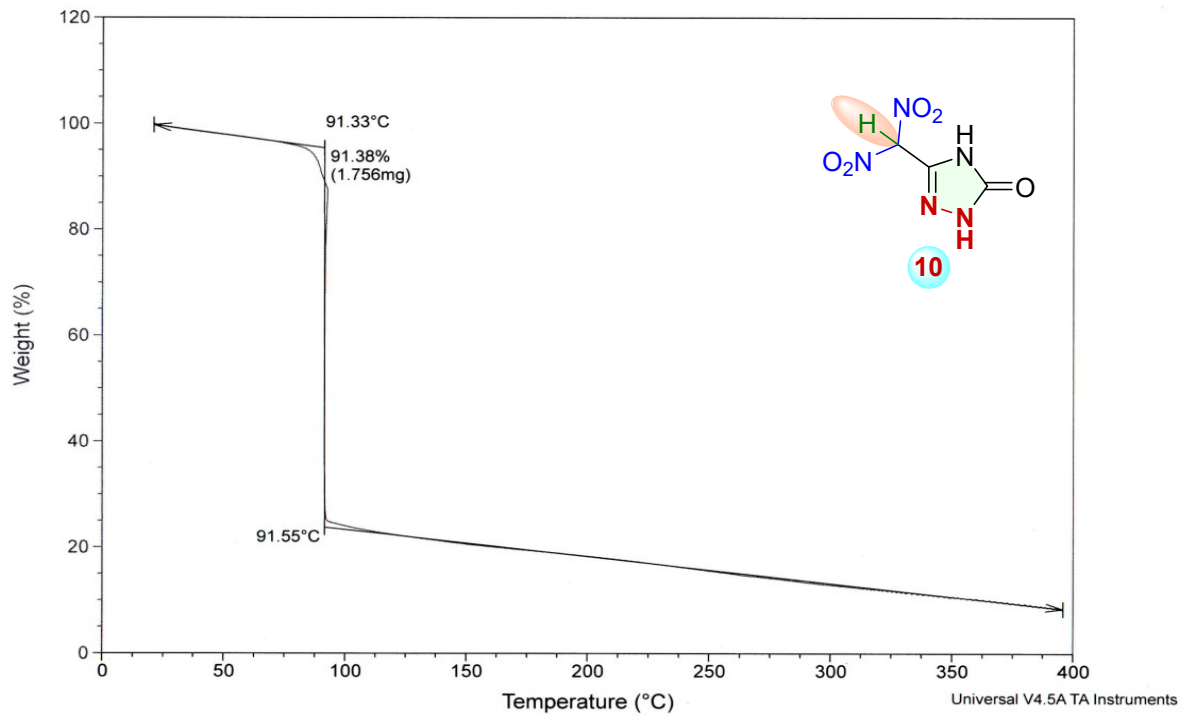

Fig. S40 TGA of compound 10 at 5 °C min<sup>-1</sup>

Sample: SOHAN-626 at 5°C  
Size: 2.0340 mg  
Method: Ramp

TGA

File: C:\...TGA\Sohan\SOHAN-626 at 5°C.001  
Operator: SOHAN  
Run Date: 01-Jun-2023 16:56  
Instrument: TGA Q50 V20.13 Build 39

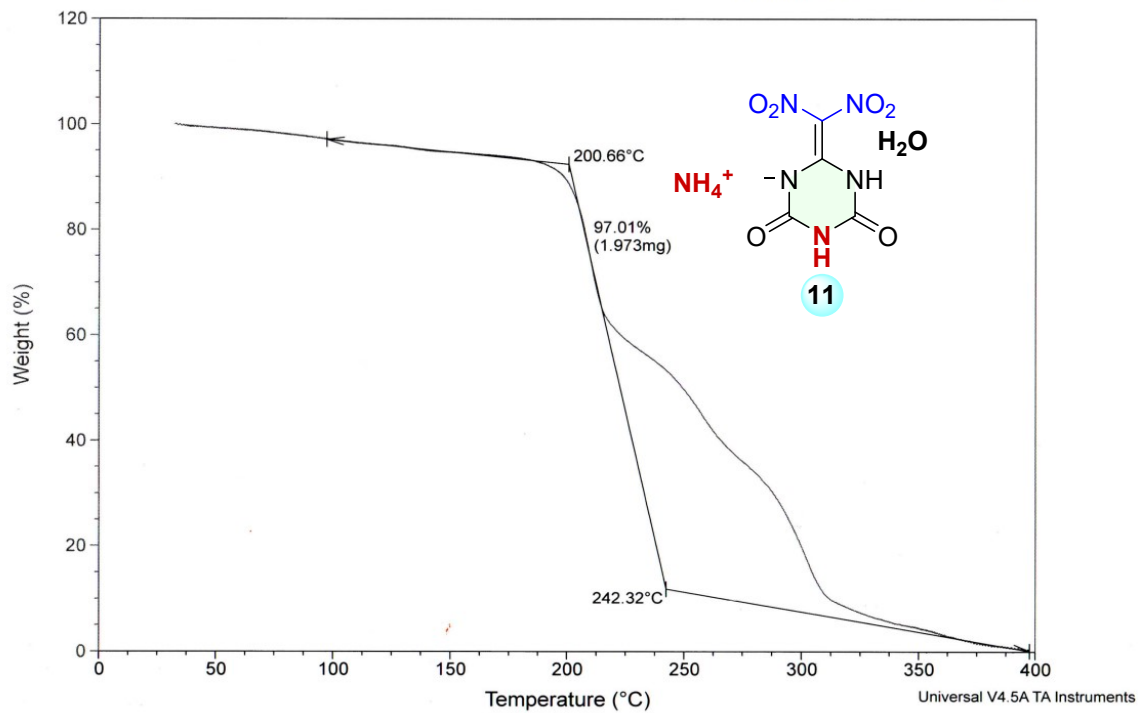

Fig. S41 TGA of compound 11.H<sub>2</sub>O at 5 °C min<sup>-1</sup>

Sample: SOHAN-FOX-7 at 5°C  
 Size: 2.3290 mg  
 Method: Ramp

TGA

File: C:\...TGA\Sohan\SOHAN-FOX-7 at 5°C.001  
 Operator: SOHAN  
 Run Date: 21-Dec-2022 13:42  
 Instrument: TGA Q50 V20.13 Build 39

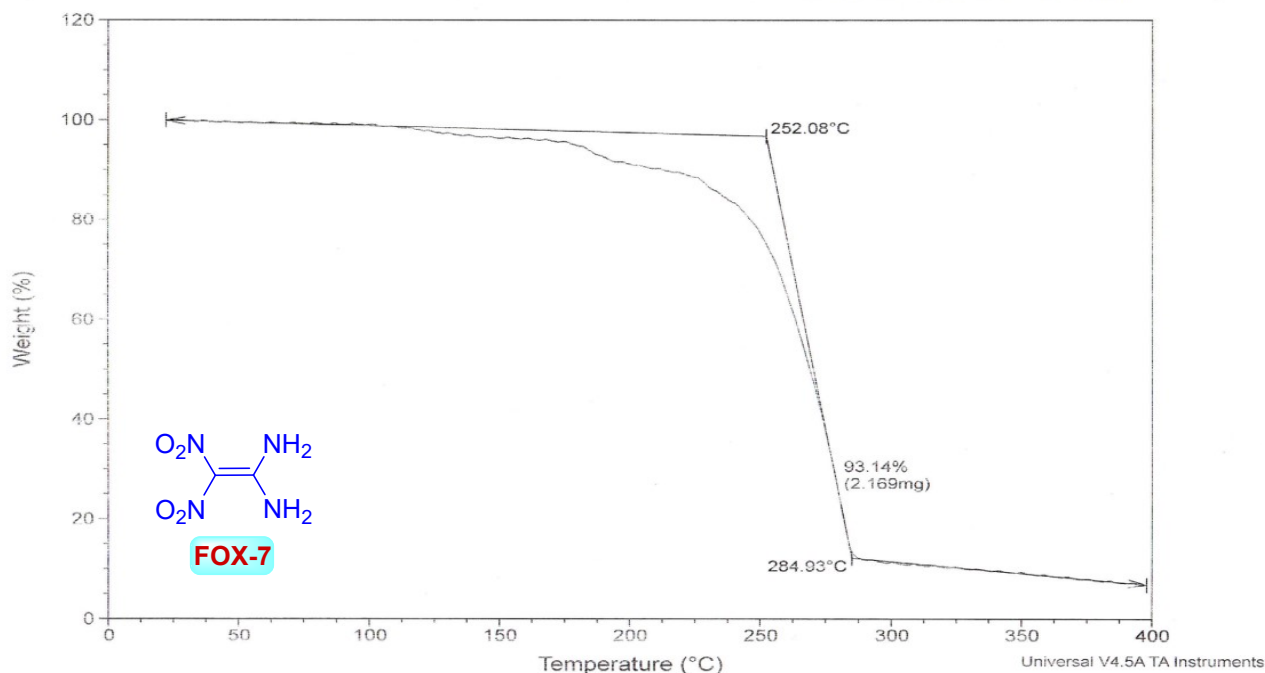

Fig. S42 TGA of compound FOX-7 at 5 °C min<sup>-1</sup>

Table S13. Cartesian coordinates (in Å) for optimized structure of compound 6 obtained using the B3LYP/6-311++G(d,p) level of theory

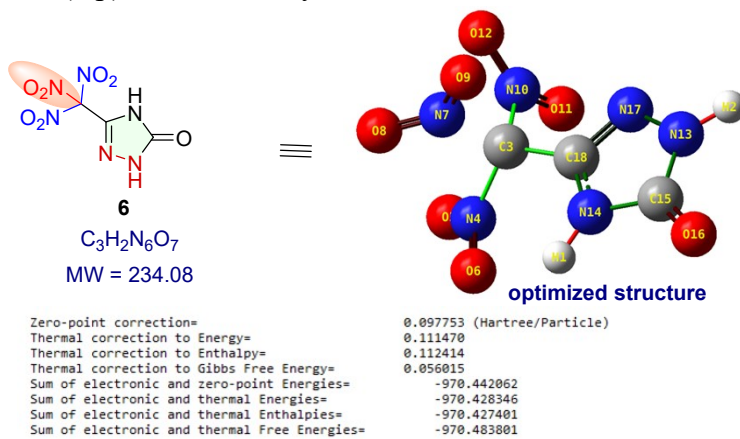

| Center Number | Atomic Symbol | Coordinates (Angstroms) |          |           |
|---------------|---------------|-------------------------|----------|-----------|
|               |               | X                       | Y        | Z         |
| 1             | H             | -0.001367               | 4.334601 | 0.062278  |
| 2             | H             | 0.829129                | 6.852583 | -3.063359 |
| 3             | C             | -2.109598               | 6.299167 | 0.185123  |
| 4             | N             | -2.838334               | 5.009304 | 0.634443  |
| 5             | O             | -4.041143               | 5.014146 | 0.656434  |
| 6             | O             | -2.087475               | 4.105848 | 0.963063  |
| 7             | N             | -1.638105               | 6.980014 | 1.543516  |
| 8             | O             | -2.315724               | 6.747190 | 2.516325  |
| 9             | O             | -0.653865               | 7.671811 | 1.453880  |
| 10            | N             | -3.144603               | 7.253918 | -0.464646 |
| 11            | O             | -3.657119               | 6.827539 | -1.470876 |
| 12            | O             | -3.335113               | 8.310339 | 0.093174  |
| 13            | N             | 0.429464                | 6.406913 | -2.252024 |
| 14            | N             | 0.001453                | 5.108857 | -0.584404 |

|    |   |           |          |           |
|----|---|-----------|----------|-----------|
| 15 | C | 0.956049  | 5.295414 | -1.594947 |
| 16 | O | 1.953298  | 4.662553 | -1.832741 |
| 17 | N | -0.733435 | 6.858987 | -1.731132 |
| 18 | C | -0.978142 | 6.060208 | -0.735905 |

Number of imaginary frequencies at the B3LYP/6-311++G(d,p) level = 0

Table S14. Cartesian coordinates (in Å) for optimized structure of compound 6-D1 obtained using the B3LYP/6-311++G(d,p) level of theory

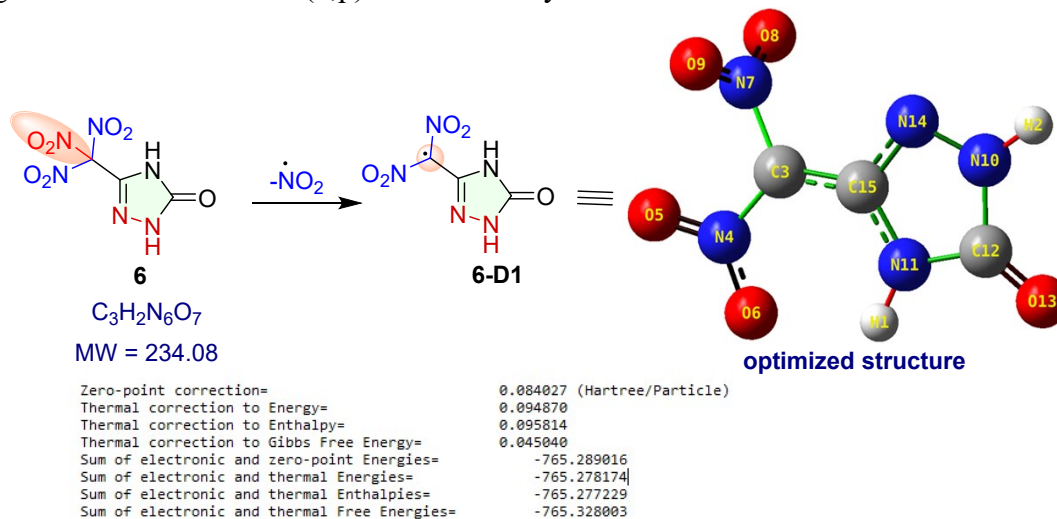

| Center Number | Atomic Symbol | Coordinates (Angstroms) |          |           |
|---------------|---------------|-------------------------|----------|-----------|
|               |               | X                       | Y        | Z         |
| 1             | H             | -0.216997               | 4.298060 | 0.004686  |
| 2             | H             | 1.050832                | 6.857733 | -2.962600 |
| 3             | C             | -2.313046               | 6.137974 | -0.288097 |
| 4             | N             | -2.799960               | 5.286427 | 0.737363  |
| 5             | O             | -3.922378               | 5.495801 | 1.176801  |
| 6             | O             | -2.043872               | 4.373875 | 1.108273  |
| 7             | N             | -3.205757               | 7.246398 | -0.679880 |
| 8             | O             | -3.850401               | 7.091975 | -1.700321 |
| 9             | O             | -3.211257               | 8.216340 | 0.054411  |
| 10            | N             | 0.521191                | 6.389577 | -2.240233 |
| 11            | O             | -0.131605               | 5.031188 | -0.686721 |
| 12            | C             | 0.952808                | 5.248959 | -1.529088 |
| 13            | O             | 1.987409                | 4.649920 | -1.644678 |
| 14            | N             | -0.682696               | 6.837203 | -1.892183 |
| 15            | C             | -1.088831               | 5.985806 | -0.919997 |

Number of imaginary frequencies at the B3LYP/6-311++G(d,p) level = 0

Table S15. Cartesian coordinates (in Å) for optimized structure of compound TNAA, 4 obtained using the B3LYP/6-311++G(d,p) level of theory

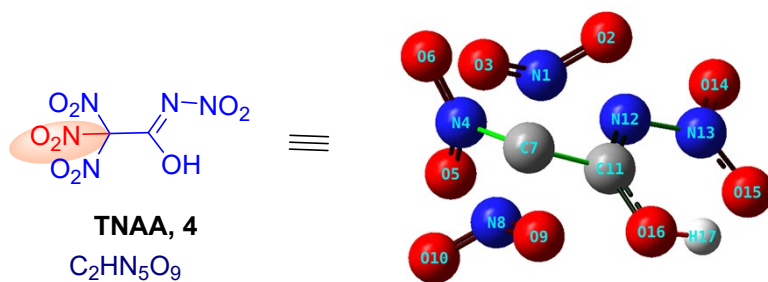

**TNAA, 4**  
 $C_2HN_5O_9$   
 MW = 239.06

|                                              |                             |
|----------------------------------------------|-----------------------------|
| Zero-point correction=                       | 0.081330 (Hartree/Particle) |
| Thermal correction to Energy=                | 0.095638                    |
| Thermal correction to Enthalpy=              | 0.096582                    |
| Thermal correction to Gibbs Free Energy=     | 0.037574                    |
| Sum of electronic and zero-point Energies=   | -1027.326554                |
| Sum of electronic and thermal Energies=      | -1027.312245                |
| Sum of electronic and thermal Enthalpies=    | -1027.311301                |
| Sum of electronic and thermal Free Energies= | -1027.370309                |

| Center Number | Atomic Symbol | Coordinates (Angstroms) |           |           |
|---------------|---------------|-------------------------|-----------|-----------|
|               |               | X                       | Y         | Z         |
| 1             | N             | -4.318756               | 1.426156  | 0.462412  |
| 2             | O             | -4.132852               | 2.379699  | 1.183437  |
| 3             | O             | -5.347684               | 0.835749  | 0.241015  |
| 4             | N             | -3.200147               | 1.202725  | -1.806394 |
| 5             | O             | -2.236794               | 0.871448  | -2.457519 |
| 6             | O             | -4.215946               | 1.738721  | -2.175780 |
| 7             | C             | -3.069615               | 0.877930  | -0.293051 |
| 8             | N             | -3.128234               | -0.669579 | -0.081946 |
| 9             | O             | -3.271271               | -0.991917 | 1.074768  |
| 10            | O             | -3.035113               | -1.373130 | -1.056051 |
| 11            | C             | -1.773451               | 1.487745  | 0.237378  |
| 12            | N             | -1.518739               | 2.657702  | -0.246077 |
| 13            | N             | -0.349155               | 3.312636  | 0.233589  |
| 14            | O             | -0.160202               | 4.409794  | -0.208011 |
| 15            | O             | 0.393148                | 2.734608  | 1.053347  |
| 16            | O             | -1.129657               | 0.756464  | 1.099494  |
| 17            | H             | -0.325692               | 1.292069  | 1.360786  |

Number of imaginary frequencies at the B3LYP/6-311++G(d,p) level = 0

Table S16. Cartesian coordinates (in Å) for optimized structure of compound TNAA-D1 obtained using the B3LYP/6-311++G(d,p) level of theory

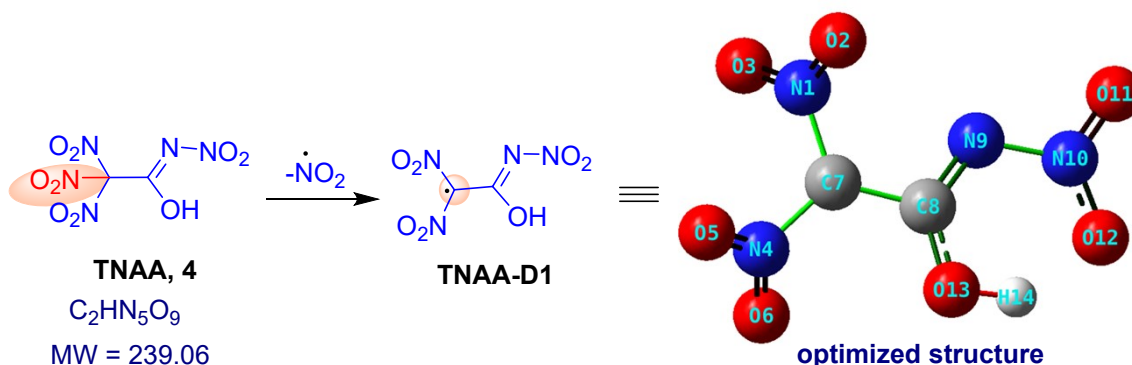

**TNAA, 4**  
 $C_2HN_5O_9$   
 MW = 239.06

|                                              |                             |
|----------------------------------------------|-----------------------------|
| Zero-point correction=                       | 0.067022 (Hartree/Particle) |
| Thermal correction to Energy=                | 0.078763                    |
| Thermal correction to Enthalpy=              | 0.079707                    |
| Thermal correction to Gibbs Free Energy=     | 0.025540                    |
| Sum of electronic and zero-point Energies=   | -822.157072                 |
| Sum of electronic and thermal Energies=      | -822.145331                 |
| Sum of electronic and thermal Enthalpies=    | -822.144386                 |
| Sum of electronic and thermal Free Energies= | -822.198553                 |

| Center Number | Atomic Symbol | X         | Coordinates (Angstroms) |           |  |
|---------------|---------------|-----------|-------------------------|-----------|--|
|               |               |           | Y                       | Z         |  |
| 1             | N             | -4.259286 | 1.666861                | 0.122107  |  |
| 2             | O             | -4.323775 | 1.355089                | 1.294158  |  |
| 3             | O             | -5.107927 | 2.223926                | -0.549429 |  |
| 4             | N             | -3.196461 | 0.415366                | -1.701345 |  |
| 5             | O             | -3.973092 | -0.511820               | -1.539226 |  |
| 6             | O             | -2.557801 | 0.678113                | -2.705358 |  |
| 7             | C             | -3.025259 | 1.315285                | -0.575705 |  |
| 8             | C             | -1.738291 | 1.843872                | -0.167633 |  |
| 9             | N             | -1.816405 | 2.899505                | 0.603828  |  |
| 10            | N             | -0.596721 | 3.454259                | 1.063327  |  |
| 11            | O             | -0.707752 | 4.329928                | 1.877061  |  |
| 12            | O             | 0.489481  | 3.038621                | 0.609584  |  |
| 13            | O             | -0.691824 | 1.197951                | -0.616406 |  |
| 14            | H             | 0.102990  | 1.715301                | -0.313394 |  |

Number of imaginary frequencies at the B3LYP/6-311++G(d,p) level = 0

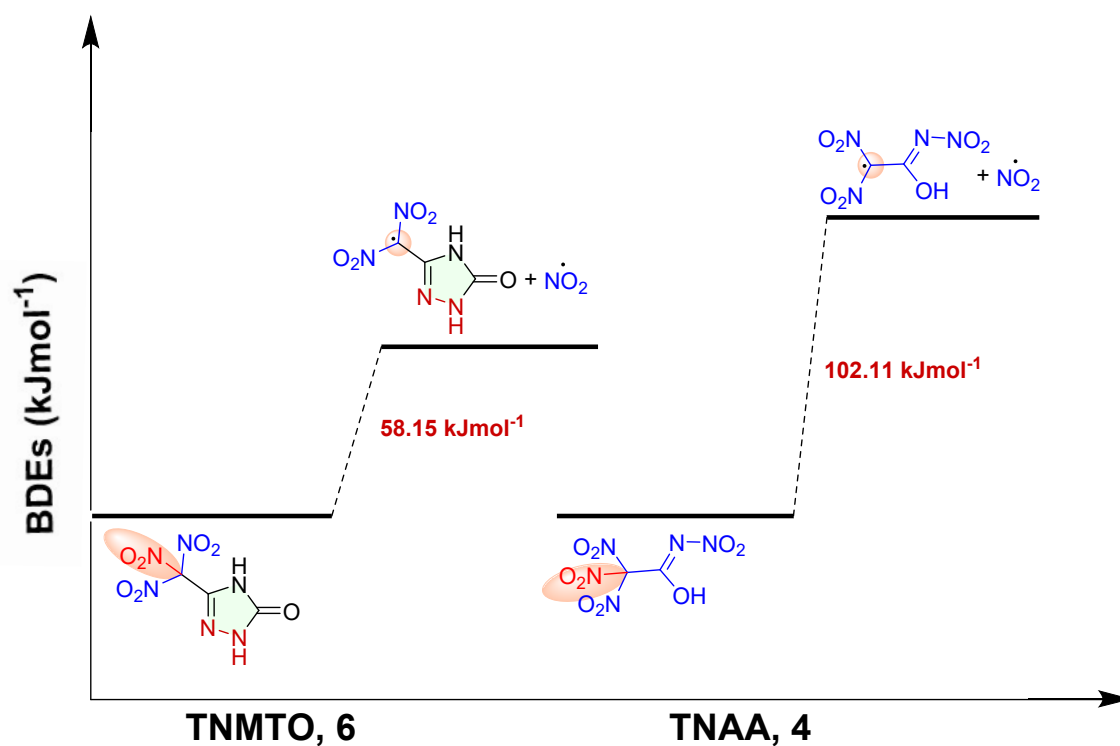

Fig. S43 Comparison of bond dissociation energies (BDEs), calculated at B3LYP/6-311++ G (d,p) level

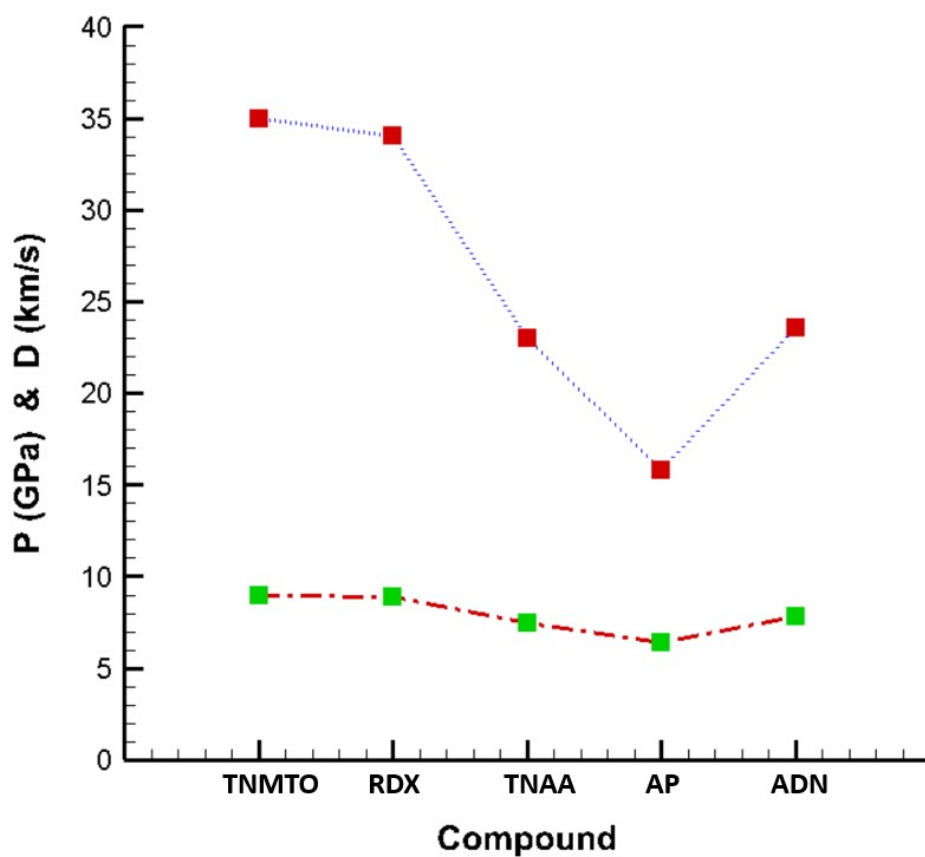

Fig. S44 Comparison of detonation velocity and detonation pressure.

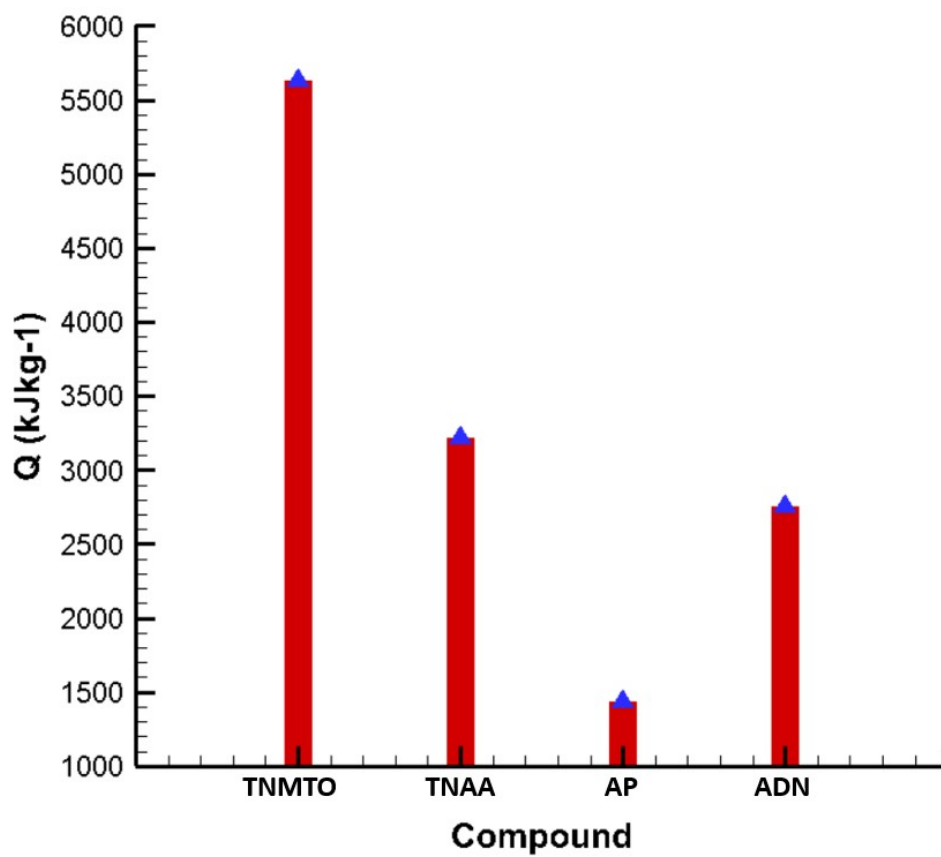

Fig. S45 Comparison of heat of detonation (Q).

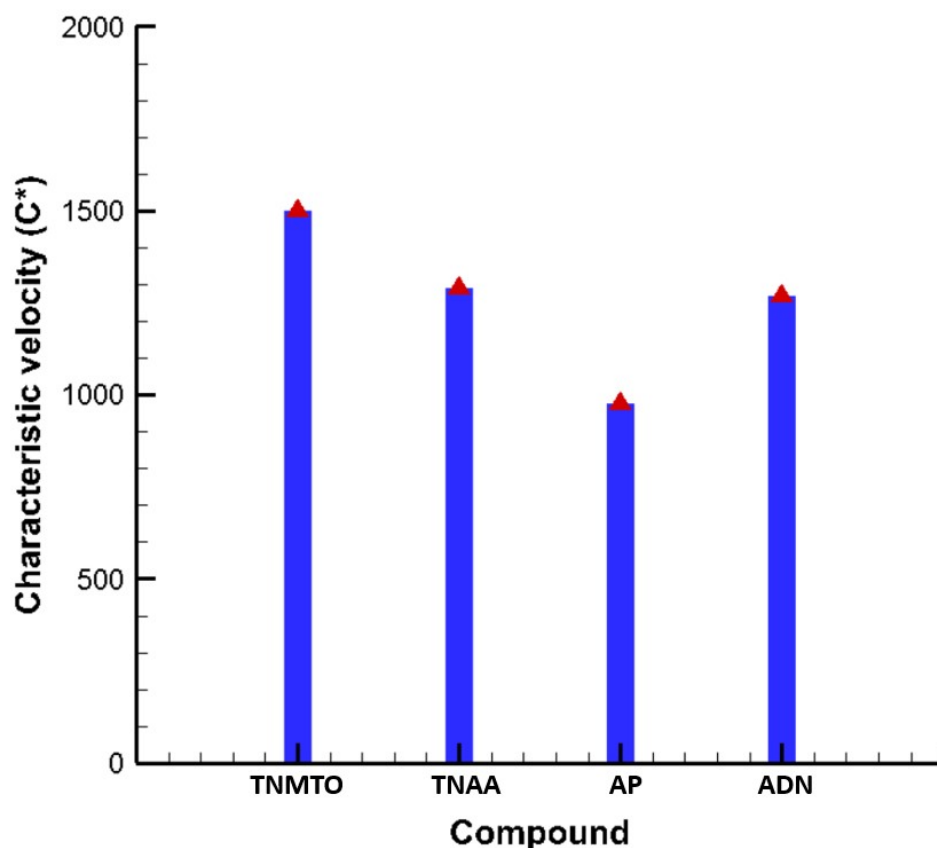

Fig. S46 Comparison of characteristic velocity ( $C^*$ ).

#### REFERENCES

1. M. J. Frisch, G. W. Trucks, H. B. Schlegel, G. E. Scuseria, M. A. Robb, J. R. Cheeseman, G. Scalmani, V. Barone, B. Mennucci, G. A. Petersson, H. Nakatsuji, M. L. Caricato, X., H. P. Hratchian, A. F. Izmaylov, J. Bloino, G. Zheng, J. L. Sonnenberg, M. Hada, M. Ehara, K. Toyota, R. Fukuda, J. Hasegawa, M. Ishida, T. Nakajima, Y. Honda, O. Kitao, H. Nakai, T. Vreven, J. A. Montgomery, Jr., J. E. Peralta, F. Ogliaro, M. Bearpark, J. J. Heyd, E. Brothers, K. N. Kudin, V. N. Staroverov, R. Kobayashi, J. Normand, K. Raghavachari, A. Rendell, J. C. Burant, S. S. Iyengar, J. Tomasi, M. Cossi, N. Rega, N. J. Millam, M. Klene, J. E. Knox, J. B. Cross, V. Bakken, C. Adamo, J. Jaramillo, R. Gomperts, R. E. Stratmann, O. Yazyev, A. J. Austin, R. Cammi, C. Pomelli, J. W. Ochterski, R. L. Martin, K. Morokuma, V. G. Zakrzewski, G. A. Voth, P. Salvador, J. J. Dannenberg, S. Dapprich, A. D. Daniels, Ö. Farkas, J. B. Foresman, J. V. Ortiz, J. Cioslowski and D. J. Fox, Revision D.01 ed., Gaussian, Inc., Wallingford, CT, 2003.
2. P. W. Atkins, Physical Chemistry, Oxford University press: Oxford 1982.
3. M. S. Westwell, M. S. Searle, D. J. Wales and D. H. Williams, Empirical correlations between thermodynamic properties and intermolecular forces, *J. Am. Chem. Soc.*, 1995, 117, 5013–5015
4. H. Gao, C. Ye, C. M. Piekarski and J. M. Shreeve, Computational characterization of energetic salts, *J. Phys. Chem. C*, 2007, 111, 10718–10731.

5. M. S. Westwell, M. S. Searle, D. J. Wales, D. H. Williams, Empirical correlations between thermodynamic properties and intermolecular forces, *J. Am. Chem. Soc.*, 1995, 117, 5013-5015.
6. G. M. Sheldrick, Crystal structure refinement with SHELXL, *Acta Crystallogr. Sect. A Found. Adv.*, 2015, C71, 3-8.
7. G. M. Sheldrick, A short history of *ShelX*, *Acta Cryst.*, 2008, A64, 112-122.
8. Twin reference: S. Parsons, Introduction to twinning *Acta Cryst.*, 2003, D59, 1995-2003.
9. (a) CrysAlisPro Software System, Rigaku Oxford Diffraction, 2020. (b) G. M. Sheldrick, ShelXT-Integrated space-group and crystal-structure determination, *Acta Cryst.*, 2015, A71, 3-8.
10. O. V. Dolomanov, L. J. Bourhis, R. J. Gildea, J. A. K. Howard and H. Puschmann, OLEX2 A complete structure solution, refinement and analysis program. *J. Appl. Crystallogr.*, 2009, 42, 339-341.
